# Supplementary material for: Case—Markdown Management at Sports Unlimited
Source: Atypon-hosted journal article supplement (doi:10.1287/ited.2013.0121cs), 2014-01-01
Supplement: markdown.xlsx [file markdown.xlsx]

## Sheet: Sheet1
ID	Branded?	Buyer	Vendor	Cost	1st Ticket Price	1st Markdown %	1st Week of Lifecycle	1st Markdown in Week #	Unite Sales by Week 3	Units Sales	Dollar Sales	Lifecycle Length	Units Salvaged
1	1	1005	61	84.925	197.5	50	6	17	2.10989	12	1536	26	4
2	0	1011	83	144.375	460		46		5	13	6070	8	3
3	1	1011	85	67.825	172.5		46		7	16	2710	8	2
4	1	1011	85	63.575	172.5		41		5	15	2540	8	3
5	1	1005	89	92.4	220	50	7	12	3.0989	17	2256	25	3
6	1	1006	17	66.25	170		21		2	11	1824	28	9
7	1	1009	0	90	197.5		33		0	10	1961.67	16	11
8	1	1009	0	67.5	147.5		34		5	17	2500	15	6
9	1	1009	9	76.5	173.75		37		7	23	3944.3	17	0
10	1	1011	85	63.025	160		46		8	17	2690	8	6
11	1	1009	53	77.5	172.5		6		3	13	2208	43	11
12	1	1009	53	90	197.5		11		7	14	2765	8	10
13	1	1011	85	70.625	172.5		4		0	7	1196	20	17
14	0	1011	65	72	180	50	19	6	5	18	1885	9	6
15	0	1011	65	78	195	50	17	4	9	20	1785	7	4
16	0	1011	50	103.5	272.5		30		6	17	4682.5	7	7
17	0	1011	30	60.95	147.5		8		8	17	2557.5	7	7
18	0	1011	30	71.3	172.5		8		5	17	3005	7	7
19	1	1011	85	70.625	172.5		42		6	16	2810	7	8
20	0	1011	50	93.375	247.5		30		7	15	3607.5	7	9
21	0	1011	50	87.5	210		37		5	15	3167.5	8	9
22	0	1011	96	194	485		40		2	6	2950	9	18
23	1	1001	31	120	245		41		5	15	3700	8	11
24	1	1009	53	55	122.5		7		6	27	3330.53	17	2
25	1	1011	85	60	147.5		7		0	16	2300	17	13
26	1	1001	31	83.75	172.5		35		3	12	2053.33	19	18
27	1	1006	7	57.5	147.5		10		2	9	1392	39	21
28	1	1009	56	60	135	50	32	13	13	28	2041.67	22	2
29	1	1011	85	100	245		38		6	19	4722.5	7	11
30	1	1004	61	84.925	197.5	50	32	5	4	13	1900	17	18
31	1	1009	56	60	135		32		3	19	2525	22	12
32	1	1001	38	88.875	197.5		14		3	17	3340	18	15
33	1	1009	0	132.5	295	60	39	6	8	17	2521.67	10	15
34	1	1009	56	60	135	60	32	13	13	28	2006.67	22	4
35	1	1009	53	67.5	147.5		6		8	19	2875	9	13
36	1	1011	85	70.625	172.5	60	8	11	14	28	2455	16	4
37	1	1009	56	41.25	115		20		2	23	2688	25	10
38	1	1009	78	38.125	81.25		32		14	31	2502.5	22	2
39	1	1006	14	57.5	160	50	35	10	7	33	2821.67	19	1
40	1	1009	56	75	170	50	32	13	18	32	2930	17	2
41	0	1011	65	59	147.5		45		7	22	3195	9	12
42	1	1001	38	66.375	147.5	60	10	6	15	13	1425.83	9	22
43	1	1001	31	108.75	222.5		47		9	23	5040	7	12
44	1	1006	7	57.5	147.5		28		1	29	4209.06	21	6
45	1	1006	7	50	122.5	50	28	8	0	33	1878.33	21	2
46	1	1006	7	40	97.5	50	19	9	10.0385	29	1392	30	6
47	1	1009	78	42	110		13		1	13	1440	32	22
48	1	1009	0	77.5	172.5	60	28	17	14.3846	14	1632	26	21
49	0	1011	50	61.25	172.5		47		6	17	2847.5	7	18
50	0	1011	63	56.5	295		46		7	16	4662.5	8	19
51	1	1011	85	96.05	245		46		9	25	6187.5	8	10
52	1	1001	31	120	245	60	7	9	5.90769	12	1536	25	24
53	0	1004	61	74.175	172.5		12		1	16	2730	16	20
54	1	1004	89	75.6	180	50	33	8	0	15	1695	21	21
55	1	1004	89	71.4	170	60	12	18	7	26	1883.33	20	10
56	0	1004	61	84.925	197.5		12		9	24	4702.5	7	12
57	1	1005	61	47.3	110		7		3	13	1440	25	23
58	1	1005	61	84.925	197.5		3		2	7	1440	29	29
59	1	1005	48	67.5	147.5	60	8	11	7.47253	24	1632	24	12
60	0	1005	61	84.925	197.5	60	3	13	15	24	2761.67	16	12
61	0	1005	61	95.675	222.5		2		2	8	1735	8	28
62	1	1005	82	36.8	85		2		9	31	2647.5	8	5
63	1	1006	7	50	122.5		18		1	25	3072	31	11
64	1	1006	14	55	145		17		3	23	3360	32	13
65	1	1006	17	54.375	122.5		14		1	14	1680	35	22
66	1	1006	7	67.5	172.5	50	36	8	7	30	2100	13	6
67	1	1006	14	57.5	160	60	36	9	13	32	2438.33	13	4
68	1	1006	17	37.5	97.5		11		14	30	2922.5	8	6
69	1	1006	17	37.5	97.5		20		11	31	3045	8	5
70	1	1006	17	36.25	97.5		29		8	28	2735	8	8
71	1	1009	0	77.5	172.5	50	33	8	8	25	2205	21	11
72	1	1009	9	58.5	135	50	32	13	19	24	1960	17	12
73	0	1011	24	60.9	145		12		1	20	2925	12	16
74	1	1011	85	67.1	172.5		10		7	24	4107.5	14	12
75	0	1011	4	58.5	146.25		12		1	19	2747.5	12	17
76	1	1011	85	60	147.5	50	12	7	1	29	2542.5	12	7
77	0	1011	4	48.5	121.25	50	34	7	16	35	1900	11	1
78	0	1011	0	69	172.5	50	10	9	17	28	3385	14	8
79	0	1011	4	48.5	121.25	50	34	7	13	34	1713.33	11	2
80	1	1011	85	67.1	172.5	50	10	11	14	30	2781.67	14	6
81	0	1011	4	68.5	171.25	50	12	7	7	28	2507.5	12	8
82	0	1011	65	68	170		30		6	15	2542.5	7	21
83	0	1011	96	45	112.5		30		9	25	2810	7	11
84	1	1011	85	80.625	197.5		34		7	25	4927.5	7	11
85	0	1011	50	93.375	247.5		30		11	30	7537.5	7	6
86	0	1011	50	43.875	122.5		30		11	27	3330	7	9
87	1	1011	85	63.575	172.5		42		11	27	4580	7	9
88	1	1011	85	76.6	197.5		29		5	18	3492.5	8	18
89	0	1011	65	68	170		29		9	21	3572.5	8	15
90	1	1011	85	67.1	172.5		29		10	25	4290	8	11
91	0	1011	65	79	197.5		7		11	23	4525	8	13
92	0	1011	4	58.5	146.25		7		7	18	2572.5	8	18
93	1	1011	85	91.25	222.5		33		7	21	4597.5	8	15
94	1	1011	85	76.6	197.5		29		9	22	4310	8	14
95	1	1011	85	65.625	160		16		7	23	3622.5	8	13
96	0	1011	65	48	120		29		8	23	2742.5	8	13
97	1	1011	85	52.25	135		28		8	19	2520	9	17
98	1	1011	85	40	97.5		15		10	27	2675	9	9
99	0	1004	61	84.925	197.5		12		6	16	3067.5	7	21
100	1	1001	31	83.75	172.5		39		5	33	5731.83	15	5
101	1	1001	31	58.75	122.5		37		6	28	3477.5	17	10
102	1	1004	50	88	220	50	36	9	0	22	2727.5	18	16
103	1	1011	85	50	122.5	50	36	12	11	26	1700	18	12
104	0	1011	50	63.75	160		47		6	17	2680	7	21
105	1	1004	48	77.5	172.5	50	32	5	11	27	2533.33	22	12
106	0	1006	17	47.5	122.5	50	29	12	3.75824	38	1824	25	1
107	1	1006	17	41.25	105		7		9	27	2850	8	12
108	0	1011	24	42.25	145	60	35	9	17	38	2035	19	1
109	1	1006	10	27.5	90	50	16	8	21	35	1715	12	5
110	1	1011	85	52.25	135	50	9	12	15	37	2981.67	15	3
111	0	1011	50	66	197.5		46		2	7	1333.75	8	33
112	1	1001	38	77.625	172.5		38		12	36	6145	16	5
113	1	1006	7	50	122.5	50	29	7	8	35	3112.5	20	6
114	1	1009	0	90	197.5	50	32	9	16	40	3990	22	1
115	1	1009	9	47.5	98.75		25		9	39	3840	29	2
116	1	1011	85	38.425	97.5		46		16	35	3395	8	6
117	1	1006	7	57.5	147.5	50	30	6	0	35	2540	19	7
118	1	1006	7	45	110		7		8	23	2555	8	19
119	1	1006	17	54.375	122.5		7		8	28	3377.5	8	14
120	1	1006	17	38.75	97.5		7		9	27	2585	8	15
121	1	1006	7	47.5	122.5		7		6	22	2702.5	8	20
122	1	1006	17	54.375	122.5		6		12	26	3205	9	16
123	1	1009	9	42.5	90	60	32	13	19	41	1768.33	17	1
124	0	1011	24	54.375	160	50	32	12	11	37	2403.33	17	5
125	0	1011	24	69.7	170		46		5	16	2797.5	8	26
126	0	1011	24	188.1	495		40		9	19	9365	9	23
127	1	1001	38	144	320	50	14	5	16	40	6211.67	18	3
128	1	1001	38	110.25	245		36		12	23	5576.67	18	20
129	1	1001	38	66.375	147.5		38		7	26	3796.67	16	17
130	1	1009	53	38.5	122.5	50	15	10	4.28571	39	1872	34	4
131	1	1009	56	41.45	97.5	60	32	13	17	41	1971.67	22	2
132	1	1004	48	77.5	172.5	50	32	5	6	29	2713.33	17	15
133	0	1011	30	60.95	147.5		2		17	37	5472.5	8	7
134	0	1011	24	64	160		46		10	30	4840	8	14
135	1	1001	38	73.75	147.5		39		0	12	1826.67	15	33
136	1	1006	7	61.875	172.5		37		0	21	3667.5	12	24
137	1	1009	0	67.5	147.5		33		9	22	3310	8	23
138	1	1001	31	71.25	147.5		14		8	27	4052.89	18	19
139	1	1001	31	108.75	222.5		7		4	7	1567.5	8	39
140	1	1006	17	37.5	97.5		20		2	20	1968	29	26
141	1	1006	7	47.5	122.5	50	24	8	1.93407	44	2112	25	2
142	1	1006	7	52.5	135	50	16	8	6	29	1872	33	17
143	1	1006	17	46.25	122.5	50	36	8	10	43	2290	13	3
144	1	1006	7	42.5	110	50	29	7	7	31	1733.33	20	15
145	1	1006	7	67.5	172.5		45		8	27	4680	9	19
146	1	1009	9	58.5	135	50	35	6	13	37	2840	10	9
147	1	1009	53	100	222.5		7		12	32	7185	8	14
148	1	1009	9	42.75	98.75		19		9	45	4416	35	1
149	1	1011	85	45	110	50	6	13	24	40	2580	18	6
150	1	1001	38	66.375	147.5		7		9	34	5060.43	12	13
151	1	1001	31	71.25	147.5	50	3	13	10.1538	22	2016	29	25
152	1	1001	38	98.75	197.5		37		11	17	3433.33	12	30
153	1	1006	7	42.5	110		33		1	42	4649.59	16	5
154	1	1006	17	37.5	97.5		20		0	28	2775	17	19
155	1	1006	7	57.5	147.5		34		0	18	2655	15	29
156	1	1006	17	41.25	110		21		1	20	2160	28	27
157	1	1006	7	45	110	50	28	8	8	46	2540	21	1
158	1	1006	7	45	110	50	28	8	1	42	2158.33	21	5
159	1	1006	7	50	122.5	50	33	8	10	45	2775	16	2
160	1	1006	7	42.5	110	50	22	10	9.67033	44	2112	27	3
161	1	1006	17	37.5	97.5	50	22	6	6.61538	43	2064	27	4
162	1	1006	7	40	97.5	50	23	9	6.61538	43	2064	26	4
163	1	1006	7	37.5	97.5	50	28	8	13	44	2043.33	21	3
164	1	1006	17	66.25	170	50	20	8	4.83516	24	2112	29	23
165	1	1006	17	41.25	110	50	34	7	2	33	1668.33	15	14
166	1	1006	7	67.5	172.5	50	28	13	26	42	3783.33	21	5
167	1	1006	7	52.5	135	50	33	8	6	41	2191.67	16	6
168	1	1006	17	37.5	97.5	60	37	7	17	42	1863.33	12	5
169	1	1006	7	67.5	172.5		2		9	24	4175	8	23
170	1	1009	0	55	122.5	50	33	8	7	30	2008.33	16	17
171	1	1009	9	40.5	95	50	15	13	14.2308	37	1776	30	10
172	1	1011	85	70.625	172.5		33		6	17	3017.5	8	30
173	0	1011	63	46.25	97.5		40		10	29	2822.5	9	18
174	1	1001	38	77.625	172.5		23		3	24	4224	26	24
175	1	1001	31	58.75	122.5	50	23	13	6.68132	28	1824	26	20
176	1	1001	31	96.25	197.5	50	12	9	13	32	3910	20	16
177	1	1001	31	108.75	222.5	50	35	10	8	32	3830	14	16
178	1	1001	38	73.75	147.5	50	39	5	17	24	2330	10	24
179	1	1001	31	132.5	270		34		16	35	9582.84	15	13
180	1	1001	38	77.625	172.5		5		14	19	3303.33	14	29
181	1	1001	31	40	85	60	3	13	19.3846	42	2016	29	6
182	1	1001	38	72	160		6		12	22	3545	13	26
183	1	1004	33	46.875	122.5	50	12	13	27	44	3065	20	4
184	1	1004	33	66.875	172.5	50	12	15	26	46	3751.67	20	2
185	1	1004	33	59.375	147.5	50	12	15	27	44	3391.67	20	4
186	1	1004	33	66.875	172.5	60	12	11	20	44	3018.33	20	4
187	1	1004	33	66.875	172.5	60	12	9	1	25	1985	20	23
188	1	1005	7	51.625	147.5	60	4	17	24	43	3750	20	5
189	1	1005	33	59.375	147.5	60	8	8	9.89011	35	2160	24	13
190	1	1005	61	75.25	222.5		6		0	24	5330	18	24
191	1	1006	10	30	90		14		3	24	2160	35	24
192	1	1006	17	38.75	97.5		12		2	22	2112	37	26
193	1	1006	7	47.5	122.5		22		5	35	4320	27	13
194	1	1006	17	41.25	110		29		1	43	4710.86	20	5
195	1	1006	17	37.5	97.5		34		1	44	4319.06	15	4
196	1	1006	7	80	197.5		33		0	25	4942	16	23
197	1	1006	17	38.75	97.5		19		2	44	4257.14	18	4
198	1	1006	17	35	90		13		3	25	2256	36	23
199	1	1006	7	67.5	172.5		33		0	20	3455	16	28
200	1	1006	17	38.75	97.5		17		3	22	2160	32	26
201	1	1006	17	55.625	145		21		1	16	2256	28	32
202	1	1006	17	50.625	122.5		20		2	18	2208	29	30
203	1	1006	7	50	122.5	50	29	7	2	41	2640	20	7
204	1	1006	17	37.5	97.5	50	20	8	7.23077	47	2256	29	1
205	1	1006	7	42.5	110	50	14	10	4.35165	44	2112	35	4
206	1	1006	7	62.5	160	50	38	6	13	37	2880	11	11
207	1	1006	17	38.75	97.5	50	18	6	2.02198	46	2208	31	2
208	1	1006	10	30	85	50	28	9	26	46	2183.33	21	2
209	1	1006	17	37.5	97.5	50	28	8	1	37	1730	21	11
210	1	1006	17	48.125	122.5	50	28	4	0	36	1890	21	12
211	1	1006	7	47.5	122.5	50	34	7	0	33	1901.67	15	15
212	1	1006	7	47.5	122.5	50	33	8	7	42	2423.33	16	6
213	1	1006	17	43.75	122.5	50	37	7	9	47	2225	12	1
214	1	1006	7	50	122.5	50	33	8	2	36	1993.33	16	12
215	1	1006	7	42.5	110	50	29	7	9	36	1921.67	20	12
216	1	1006	7	50	122.5	50	37	7	2	33	1980	12	15
217	1	1006	7	42.5	110	50	29	7	8	45	2000	20	3
218	1	1006	17	54.375	145	50	18	6	4	26	1994.48	14	22
219	1	1006	17	56.25	145	50	28	8	14	44	2867.5	17	4
220	1	1006	7	42.5	110	50	34	7	2	36	1771.67	15	12
221	1	1006	10	32.5	90	50	10	14	26	47	2255	22	1
222	1	1006	7	40	97.5	50	22	6	21	47	1993.33	15	1
223	1	1006	7	40	97.5	50	22	10	12.3956	47	2256	27	1
224	1	1006	7	50	122.5	50	35	6	27	45	2510	14	3
225	1	1006	7	50	122.5	50	37	7	1	29	1695	12	19
226	1	1006	7	50	122.5	50	32	9	1	34	1838.33	17	14
227	1	1006	7	52.5	135	50	33	8	11	41	2565	16	7
228	1	1006	17	40	105	50	30	7	21	46	2245	19	2
229	1	1006	17	38.75	105	50	37	7	14	47	1973.33	12	1
230	1	1006	17	52.5	195	50	30	7	8	44	3323.33	19	4
231	1	1006	10	32.5	90	50	14	10	16.9231	44	2112	35	4
232	1	1006	17	37.5	97.5	50	24	8	8.08791	46	2208	25	2
233	1	1006	17	43.75	115	50	37	7	11	44	2001.67	12	4
234	1	1006	17	55.625	147.5	60	38	6	17	32	2013.33	11	16
235	1	1006	7	57.5	147.5	60	37	7	1	32	1948.33	12	16
236	1	1006	17	46.25	122.5	60	37	7	18	45	2251.67	12	3
237	1	1006	7	45	110	60	37	7	23	46	2315	12	2
238	1	1006	7	45	110	60	22	10	21.2308	46	2208	27	2
239	1	1006	17	37.5	97.5	60	29	8	21	47	2641.67	20	1
240	1	1006	7	67.5	172.5		2		9	23	3947.5	8	25
241	1	1006	17	37.5	97.5		24		10	27	2622.5	8	21
242	1	1006	17	52.5	122.5		29		12	36	4352.5	8	12
243	1	1006	7	50	122.5		2		12	40	4937.5	8	8
244	1	1006	7	57.5	147.5		10		9	25	3687.5	9	23
245	1	1006	17	45	120		28		9	23	2800	9	25
246	1	1009	76	30	65		7		3	33	2160	38	15
247	1	1009	0	55	122.5	50	35	6	0	32	1901.67	14	16
248	1	1009	0	77.5	172.5	50	33	8	10	43	3341.67	16	5
249	1	1009	56	40.625	95	50	21	11	8.96703	34	1632	24	14
250	1	1009	56	73.75	148.75		20		14	42	6310	8	6
251	1	1009	56	57.5	130		20		10	33	4292.5	8	15
252	1	1009	9	47.5	98.75		10		11	27	2700	9	21
253	0	1011	0	59	147.5		12		0	21	3142	12	27
254	0	1011	63	2.5	122.5		33		0	18	2158	16	30
255	0	1011	96	72	180		34		0	24	4380	15	24
256	0	1011	0	49	122.5	50	10	9	13	40	3140	14	8
257	1	1011	85	57	147.5	50	9	10	1	38	3032.5	15	10
258	0	1011	96	64.375	162.5	50	12	7	9	39	3732.5	12	9
259	0	1011	24	60.9	145	50	13	6	13	38	3277.5	11	10
260	0	1011	0	69	172.5	50	36	8	1	42	3423.33	13	6
261	0	1011	24	56.7	135	50	13	6	14	38	2547.5	11	10
262	0	1011	0	59	147.5	50	8	11	13	45	3286.67	16	3
263	0	1011	0	34	85	50	12	7	7	45	1743.33	12	3
264	0	1011	96	75	187.5	50	34	10	10	42	3850	15	6
265	0	1011	30	56.35	135	50	20	5	14	41	2473.33	8	7
266	0	1011	0	44	110	50	11	8	9	41	1900	13	7
267	0	1011	24	67.2	160	50	16	5	13	32	2445	8	16
268	0	1011	24	47.125	160	50	36	8	1	46	2380	13	2
269	0	1011	24	34.125	115	50	37	7	2	45	1741.67	12	3
270	0	1011	50	82.5	197.5	50	37	8	9	38	3557.5	12	10
271	0	1011	24	48.3	115	50	12	7	9	31	1856.67	12	17
272	0	1011	0	69	172.5	60	10	9	15	37	3138.33	14	11
273	0	1011	0	69	172.5	60	11	8	26	43	3890	13	5
274	0	1011	96	64.375	162.5	60	12	7	18	44	3303.33	12	4
275	0	1011	96	60	147.5		8		14	29	4310	7	19
276	0	1011	50	93.375	247.5		30		12	34	8390	7	14
277	0	1011	50	64.125	170		30		12	26	4435	7	22
278	0	1011	50	70.875	197.5		30		11	35	6955	7	13
279	0	1011	65	68	170		29		9	23	3987.5	8	25
280	1	1011	85	86.7	222.5		29		9	19	4122.5	8	29
281	1	1011	85	142.5	347.5		33		7	22	7660	8	26
282	0	1011	24	81.9	195		7		3	10	1921.25	8	38
283	1	1011	85	91.25	222.5		33		8	23	5190	8	25
284	0	1011	65	59	147.5		7		8	27	3917.5	8	21
285	0	1011	83	87.5	210		29		7	20	4102.5	8	28
286	0	1011	65	68	170		29		8	22	3742.5	8	26
287	1	1011	85	50	122.5		16		8	21	2590	8	27
288	1	1011	85	63.575	172.5		41		14	37	6455	8	11
289	1	1011	85	77.1	197.5		29		12	28	5607.5	8	20
290	1	1011	85	63.575	172.5		41		12	38	6510	8	10
291	0	1011	30	60.95	147.5		7		9	31	4500	8	17
292	0	1011	24	38.95	95		46		11	27	2527.5	8	21
293	1	1011	85	142.5	347.5		32		8	21	7157.5	9	27
294	1	1011	85	70.625	172.5		32		5	17	2867.5	9	31
295	1	1001	31	132.5	270	50	22	10	4.64835	17	2256	32	32
296	1	1006	7	57.5	172.5	60	37	7	24	48	3253.33	17	1
297	1	1009	9	38.25	90	50	35	10	26	46	1966.67	14	3
298	1	1001	31	71.25	147.5		42		13	43	6356.67	12	7
299	0	1004	89	75.6	180	50	33	8	9	37	3160	16	13
300	1	1004	33	74.375	197.5		32		0	22	4430	22	28
301	1	1009	76	37.5	80	60	6	19	21.2308	46	2208	39	4
302	1	1011	85	34.125	97.5	60	7	12	21	46	2403.33	17	4
303	1	1006	10	36.25	97.5		2		12	39	3842.5	8	12
304	1	1001	38	77.625	172.5		37		9	42	7233.33	17	10
305	1	1004	33	66.875	172.5		32		0	25	4364	22	27
306	0	1011	96	75	190		7		13	33	6185	8	19
307	1	1001	38	110.25	245		37		10	47	11607.9	17	6
308	1	1001	31	58.75	122.5	50	6	10	2.78022	36	2208	26	17
309	1	1001	38	55.125	122.5	50	14	5	21	41	2683.33	18	12
310	0	1006	17	40	105	50	29	12	23	50	2672.5	20	3
311	1	1006	7	57.5	147.5	50	37	4	11	42	2708.33	12	11
312	1	1006	7	37.5	97.5	50	10	14	23.0769	50	2400	39	3
313	1	1006	10	32.5	95	60	36	8	19	46	2363.33	13	7
314	1	1006	14	33.75	95	60	35	10	29	48	2156.67	19	5
315	1	1009	82	33.75	95	60	19	13	17.7692	42	2016	26	11
316	1	1004	89	81.9	195	60	13	8	2	27	2840	19	27
317	1	1004	77	85	197.5	60	15	6	9	33	3040	17	21
318	1	1004	77	80	172.5	60	12	9	19	36	3055	20	18
319	1	1005	77	90	197.5	50	10	15	22	39	4600	22	15
320	1	1005	77	80	172.5	60	11	8	7	28	2807.5	21	26
321	1	1005	77	80	172.5	60	12	7	7	30	2567.5	20	24
322	1	1005	77	90	197.5	60	10	9	23	35	3255	22	19
323	0	1011	81	54.375	147.5	50	15	4	16	35	2780	9	19
324	1	1001	31	83.75	172.5		33		16	27	4660	21	28
325	1	1001	31	71.25	147.5	50	22	8	9.13846	34	2592	32	21
326	1	1009	9	47.5	98.75		35		31	51	5075	19	4
327	1	1001	38	100.125	222.5		33		1	39	8660	21	17
328	1	1001	31	83.75	172.5		13		8	38	6497.5	19	18
329	1	1001	38	55.125	122.5		32		15	26	3210	17	30
330	1	1001	38	66.375	147.5	50	23	9	22.6154	29	2352	26	27
331	1	1006	10	35	95	50	37	7	9	50	1831.67	12	6
332	1	1006	10	35	95	50	37	7	11	41	1700	12	15
333	1	1006	10	35	95	50	37	7	21	53	2275	12	3
334	1	1006	10	31.25	95		2		20	45	4282.5	8	11
335	1	1006	7	45	110		46		14	35	3887.5	8	21
336	1	1006	7	57.5	172.5		10		5	17	2872.5	9	39
337	1	1009	82	37.5	105	50	19	9	10.989	50	2400	26	6
338	1	1009	78	70	145	60	32	13	33	54	3788.33	22	2
339	1	1009	9	22.5	50		24		19	54	2688	30	2
340	1	1001	31	46.25	97.5		30		1	46	4504.6	19	11
341	1	1001	38	66.375	147.5		35		12	54	7962.64	19	3
342	1	1001	31	96.25	197.5	50	23	9	2.76923	26	2688	31	31
343	1	1001	38	43.875	97.5		32		15	48	4646.67	13	9
344	1	1001	38	43.875	97.5		33		1	42	4070	21	15
345	1	1001	31	58.75	122.5	50	23	9	5.1978	33	2064	26	24
346	1	1001	38	88.875	197.5	50	32	9	11	34	3905	22	23
347	1	1001	31	71.25	147.5	50	3	13	21.1538	35	2640	29	22
348	1	1001	38	43.875	97.5		14		14	26	2495	18	31
349	1	1006	17	56.25	145		30		14	37	5417.5	7	20
350	1	1006	7	37.5	97.5		47		10	34	3352.5	7	23
351	1	1009	9	40	105	60	14	18	21.6923	47	2256	31	10
352	1	1001	31	46.25	97.5		15		11	45	4426.5	17	13
353	1	1001	31	46.25	97.5	50	30	7	18	33	1880	11	25
354	1	1001	38	55.125	122.5		32		5	22	2663.33	22	36
355	0	1004	61	84.925	197.5	50	32	5	25	45	4363.33	9	13
356	1	1006	17	53.125	122.5	50	24	8	4.65934	43	2544	25	15
357	1	1009	82	52.9	120	60	37	11	25	54	2871.67	17	4
358	1	1009	9	22.5	50		35		27	54	2717.5	19	4
359	1	1009	9	22.5	50		28		19	56	2784	26	2
360	1	1009	9	47.5	98.75		19		13	53	5280	35	5
361	0	1011	81	50	135	50	15	4	17	42	3332.5	9	16
362	0	1011	38	28.125	85	50	11	8	20	50	2268.33	13	8
363	1	1011	85	57.625	147.5		46		13	31	4537.5	8	27
364	0	1011	63	96.25	197.5		40		8	24	4810	9	34
365	1	1001	31	71.25	147.5		3		5	15	2160	29	44
366	1	1001	31	46.25	97.5	50	4	12	9.6	52	2496	28	7
367	1	1001	31	71.25	147.5	50	3	13	16.6154	34	2592	29	25
368	1	1001	38	66.375	147.5	50	4	5	1	31	2573.33	15	28
369	1	1005	61	74.175	172.5	60	7	16	16.3077	33	2544	25	26
370	1	1006	17	38.75	97.5		15		8	57	5568	34	2
371	1	1006	17	37.5	97.5	50	25	7	2.57143	52	2496	24	7
372	1	1006	17	46.25	122.5	50	26	6	2.76923	56	2688	23	3
373	1	1009	9	57.5	120		35		16	57	6827.76	19	2
374	1	1011	85	47.5	122.5	50	9	10	16	54	3907.5	15	5
375	0	1011	0	89	222.5	50	9	10	7	47	4638.33	15	12
376	1	1001	31	40	85		3		9	33	2832	25	27
377	1	1001	31	96.25	197.5	50	24	12	10.8923	29	2832	25	31
378	1	1001	38	110.25	245		37		1	45	11076.7	17	15
379	1	1001	38	66.375	147.5		3		2	44	6526.67	16	16
380	1	1001	38	66.375	147.5		17		5	25	3681.67	15	35
381	1	1001	31	58.75	122.5	50	21	15	7.69231	40	2400	24	20
382	1	1001	31	58.75	122.5		32		7	50	6085	22	10
383	1	1001	38	66.375	147.5	50	4	5	0	33	2670	15	27
384	1	1001	31	46.25	97.5	50	3	13	13.0549	54	2592	29	6
385	1	1001	38	43.875	97.5	50	7	9	35	57	3056.67	12	3
386	1	1001	38	43.875	97.5	50	6	10	1	38	1896.67	13	22
387	1	1001	38	49.5	110	50	9	7	19	46	2660	10	14
388	1	1001	31	108.75	222.5		16		4	13	2905	8	47
389	0	1004	89	60.9	145	60	21	9	15	24	1971.67	11	36
390	1	1006	17	42.5	110		18		1	25	2784	31	35
391	1	1006	17	38.75	97.5	50	16	8	12.5275	57	2736	33	3
392	1	1006	7	37.5	97.5	50	22	10	21.5385	56	2688	27	4
393	1	1006	17	46.25	122.5	50	27	5	2	50	2595	14	10
394	1	1006	17	38.75	97.5	50	12	12	6.64835	55	2640	37	5
395	1	1006	35	57.5	147.5	50	34	10	2	47	2885	15	13
396	1	1006	7	40	97.5	50	25	7	5.01099	57	2736	24	3
397	1	1006	17	40	105	50	24	8	21.5385	56	2688	25	4
398	1	1006	10	35	97.5		3		15	33	3220	7	27
399	1	1006	7	50	122.5		7		11	31	3797.5	8	29
400	1	1006	17	41.25	105		7		10	35	3672.5	8	25
401	1	1006	17	37.5	97.5		24		13	38	3682.5	8	22
402	1	1009	0	90	197.5		32		10	38	7550	22	22
403	1	1009	0	67.5	147.5	60	28	17	1.78022	17	1296	26	43
404	0	1011	0	59	147.5	50	9	10	1	51	3463.33	15	9
405	0	1011	24	70	185	50	12	7	21	52	5882.5	12	8
406	0	1011	0	41.65	122.5	50	37	7	1	52	2676.67	12	8
407	0	1011	24	33.6	80	50	14	7	15	51	2153.33	10	9
408	0	1011	30	60.95	147.5	50	20	5	17	42	3557.5	8	18
409	1	1011	85	45	110	50	14	7	15	45	2662.5	10	15
410	0	1011	24	71.4	170	50	13	8	12	31	3435.7	11	29
411	0	1011	24	35.7	85	50	15	6	18	52	1991.67	9	8
412	1	1011	85	62.85	172.5	50	2	4	7	45	3682.5	8	15
413	0	1011	30	37.375	90	50	17	4	19	50	2136.67	7	10
414	0	1011	0	34	85	60	36	8	34	46	1871.67	13	14
415	0	1011	81	123.9	297.5	60	35	9	2	31	3930	14	29
416	0	1011	96	70	175		7		4	9	1488.75	8	51
417	1	1011	85	76.6	197.5		29		9	24	4775	8	36
418	0	1011	24	90.2	220		41		10	31	6847.5	8	29
419	1	1011	85	76.6	197.5		29		3	10	2025	8	50
420	0	1011	30	35.65	85		2		13	33	2835	8	27
421	1	1011	85	76.6	197.5		29		18	40	7960	8	20
422	0	1011	65	52	130		7		11	31	4075	8	29
423	1	1011	85	40.5	110		19		10	28	3050	9	32
424	1	1011	85	49.5	135		19		13	34	4560	9	26
425	1	1001	38	43.875	97.5		31		2	25	2448	23	36
426	1	1001	38	77.625	172.5	50	31	10	7.91209	25	2160	23	36
427	1	1001	31	83.75	172.5	50	36	9	10	38	3748.33	13	23
428	1	1009	9	52.5	110		33		0	35	3810	21	26
429	0	1011	83	60	190		46		8	27	5197.5	8	34
430	1	1004	50	58	145		32		0	27	3882.5	22	35
431	1	1006	7	37.5	97.5	50	25	7	9.38462	61	2928	24	1
432	1	1009	82	48.3	110	50	33	15	32	57	3206.67	21	5
433	1	1011	85	65.65	180		2		6	16	2870	8	46
434	1	1006	14	52.5	145		25		3	21	2976	29	42
435	1	1006	10	32.5	95	50	28	9	2	59	2280	21	4
436	1	1006	38	28.125	97.5	50	13	11	7.63077	62	2976	41	1
437	1	1006	7	50	122.5		7		11	29	3512.5	8	34
438	1	1009	0	67.5	147.5	50	32	4	0	42	3340	22	21
439	1	1001	31	71.25	147.5		34		0	31	4624	20	33
440	1	1001	38	73.75	147.5	50	6	10	10	46	3475	13	18
441	1	1001	38	73.75	147.5	50	6	10	18	45	3720	13	19
442	1	1006	7	42.5	110		14		2	27	2928	35	37
443	1	1006	38	36.575	122.5	50	14	10	6.7033	61	2928	35	3
444	1	1006	17	52.5	145	60	29	8	33	59	4080	20	5
445	1	1006	10	30	85		7		12	31	2627.5	8	33
446	1	1011	85	85.75	245		5		6	36	8937.5	19	28
447	1	1011	85	70.625	172.5	50	6	13	9	56	4406.67	18	8
448	1	1001	31	64.125	147.5		15		1	36	5380.8	17	29
449	1	1001	38	66.375	147.5		39		13	59	8760.32	15	6
450	1	1006	38	37.5	147.5	50	14	10	2.41758	55	2640	35	10
451	1	1006	17	38.75	97.5	50	24	8	10.8308	64	3072	25	1
452	1	1006	17	56.875	145	50	38	6	19	35	2383.33	11	30
453	1	1009	9	45	95	50	32	4	8	57	2815	22	8
454	1	1001	31	58.75	122.5		42		12	49	6050	12	17
455	1	1001	38	77.625	172.5		6		0	25	4376	13	41
456	1	1001	38	86.25	172.5		37		1	50	8653.33	17	16
457	1	1001	38	66.375	147.5	50	24	6	10.8791	35	2640	25	31
458	1	1004	61	84.925	197.5	50	34	11	1	24	2827.5	20	42
459	1	1004	7	51.625	147.5	60	13	8	12	36	2291.67	19	30
460	1	1005	77	130	322.5	60	6	15	16	12	2496	26	54
461	1	1006	38	25.325	97.5		14		1	31	2976	35	35
462	1	1006	7	40	97.5		22		11	63	6144	27	3
463	1	1006	38	30	97.5		13		4	32	3072	36	34
464	1	1006	7	50	122.5	50	20	8	12	55	3120	29	11
465	1	1006	7	42.5	110	50	22	10	14.2857	65	3120	27	1
466	1	1006	17	38.75	97.5	50	12	12	20	65	3120	37	1
467	1	1006	7	45	110	50	37	7	19	53	2495	12	13
468	1	1006	35	40	97.5	60	37	7	2	41	1783.33	12	25
469	1	1006	7	42.5	110		2		11	26	2830	8	40
470	1	1006	7	42.5	110		2		12	32	3547.5	8	34
471	1	1006	7	42.5	110		10		13	37	4120	9	29
472	1	1009	76	30	65	60	6	19	18.7692	61	2222.96	39	5
473	1	1011	85	68.075	185		41		12	32	5852.5	8	34
474	0	1011	96	62.5	160		7		8	19	2962.5	8	47
475	0	1011	96	150	375		40		3	9	3500	9	57
476	1	1001	31	83.75	172.5		35		6	34	5860	19	33
477	1	1001	31	71.25	147.5	50	22	8	16.0879	41	2928	32	26
478	1	1001	38	49.5	110	50	39	9	11	43	2333.33	15	24
479	1	1006	7	70	147.5		14		6	43	6400	18	24
480	0	1006	17	38.75	97.5	50	21	7	3.06593	62	2976	28	5
481	1	1009	78	38.525	95	50	19	6	13	48	2580	13	19
482	1	1001	38	61.25	122.5		39		18	38	4650	15	30
483	1	1001	31	71.25	147.5		36		6	26	3903.33	18	42
484	1	1001	38	66.375	147.5	50	37	7	2	45	3280	12	23
485	0	1006	17	45	120	50	26	6	3.62637	66	3168	28	2
486	1	1006	14	65	170	50	17	11	7.36264	47	3216	37	21
487	1	1009	56	41.45	97.5	50	32	13	35	57	2775	17	11
488	1	1001	31	83.75	172.5	50	7	6	8.12308	36	3168	25	33
489	0	1004	7	51.625	147.5	60	13	8	23	51	3001.67	11	18
490	1	1006	7	67.5	172.5	50	15	9	8.96703	48	3264	34	21
491	1	1009	9	22.5	50		8		25	65	3232.5	7	4
492	1	1001	31	40	85		28		1	47	4022.2	21	23
493	1	1001	31	71.25	147.5		29		2	56	8249.97	20	14
494	1	1001	38	66.375	147.5	50	14	7	13	53	3975	18	17
495	1	1001	31	83.75	172.5	50	29	8	12	49	4333.33	20	21
496	1	1001	38	43.875	97.5	50	23	9	23.5385	68	3264	26	2
497	1	1001	38	43.875	97.5	50	23	9	28.7692	68	3264	26	2
498	1	1001	31	96.25	197.5	60	3	10	11.4725	28	2784	29	42
499	1	1001	31	46.25	97.5	60	9	19	20.6154	67	3216	23	3
500	1	1005	94	38.5	110	60	5	18	24.2308	63	3024	27	7
501	1	1006	14	36.25	95	50	34	11	12	56	3012.5	20	14
502	1	1006	7	57.5	147.5		2		9	22	3232.5	8	48
503	1	1009	56	37.5	85	50	16	16	28.6154	62	2976	29	8
504	1	1009	9	22.5	50		46		24	64	3200	8	6
505	1	1009	53	77.5	172.5		6		7	11	1900	9	59
506	1	1009	9	22.5	50		28		13	67	3360	26	3
507	0	1011	38	50.625	147.5	50	15	4	25	59	3805	9	11
508	1	1001	38	43.875	97.5		12		1	65	6369.19	20	6
509	1	1001	38	77.625	172.5		25		0	14	2368	12	57
510	1	1001	31	58.75	122.5		13		9	26	3196	19	45
511	1	1001	31	83.75	172.5		3		5	16	2688	29	55
512	1	1001	38	38.25	85		14		14	62	5302.05	18	9
513	1	1001	38	55.125	122.5		15		15	52	6317.33	17	19
514	1	1001	38	43.875	97.5	50	31	10	10.8308	64	3072	23	7
515	1	1001	38	77.625	172.5		14		2	52	8885	18	19
516	1	1001	38	77.625	172.5		13		2	47	8156.66	19	24
517	1	1001	31	83.75	172.5		36		0	20	3374.67	18	51
518	1	1001	31	71.25	147.5	50	7	9	10.7077	38	2784	25	33
519	1	1001	38	77.625	172.5	50	17	4	2	48	3765	15	23
520	1	1001	31	58.75	122.5	50	7	9	8	46	3036.67	12	25
521	1	1001	38	55.125	122.5	50	8	8	17	46	3075	11	25
522	1	1001	38	43.875	97.5		11		19	34	3363.33	21	37
523	1	1001	38	66.375	147.5		17		12	46	6726.67	15	25
524	1	1001	38	77.625	172.5		7		20	44	7550	8	27
525	1	1004	77	125	297.5	50	12	9	0	42	6305	20	29
526	1	1004	33	46.875	122.5	50	12	15	30	60	3925	20	11
527	0	1004	33	66.875	172.5	60	17	10	22	54	4430	15	17
528	0	1004	89	71.4	170		23		9	19	3225	9	52
529	1	1005	61	47.3	110		5		2	26	2880	27	45
530	1	1005	61	74.175	172.5	60	6	17	11.8462	29	2352	26	42
531	1	1006	35	55	147.5		36		0	25	3734	13	46
532	1	1006	7	57.5	147.5		30		0	34	4992.5	19	37
533	1	1006	7	47.5	122.5	50	15	9	7.97802	66	3168	34	5
534	1	1006	17	37.5	97.5	50	28	9	2	55	2393.33	21	16
535	1	1006	17	37.5	97.5		29		11	33	3260	8	38
536	1	1009	76	52.5	110		6		10	27	2928	39	44
537	1	1009	82	26.25	73.75	50	19	13	25.3846	60	2880	26	11
538	1	1009	56	45	98.75		6		13	57	5625	18	14
539	0	1011	81	217.25	495	50	34	10	1	42	9485	15	29
540	0	1011	24	62.725	170		29		16	36	6190	8	35
541	0	1011	24	61.5	150		40		13	38	5702.5	9	33
542	1	1001	38	77.625	172.5		2		9	55	9415	17	17
543	1	1001	38	66.375	147.5		12		0	29	4218	20	43
544	1	1001	38	66.375	147.5		10		1	61	8964.31	22	11
545	1	1001	38	49.5	110		6		2	57	6308.28	13	15
546	1	1001	38	43.875	97.5	50	25	7	9.0989	69	3312	24	3
547	1	1001	38	43.875	97.5	50	24	8	12.9231	70	3360	25	2
548	1	1001	38	88.875	197.5	50	6	10	10	50	5151.67	13	22
549	1	1001	38	55.125	122.5	50	24	8	9.69231	60	3360	25	12
550	1	1001	38	77.625	172.5	50	3	6	11	52	4365	16	20
551	1	1001	38	32.625	72.5	50	11	6	29	44	1753.33	8	28
552	1	1001	38	38.25	85	50	14	14	34	68	3278.33	18	4
553	1	1001	38	77.625	172.5		12		14	30	5166.67	20	42
554	1	1001	38	49.5	110	60	24	8	24.5769	61	3408	25	11
555	1	1001	31	40	85	60	3	13	18.7692	61	2928	29	11
556	1	1001	31	83.75	172.5	60	7	9	22.1538	34	3072	25	38
557	1	1001	38	38.25	85		11		21	51	4352.5	8	21
558	1	1004	77	85	197.5	50	13	14	2	54	4996.67	19	18
559	1	1004	61	41.925	97.5	50	35	10	0	60	2595	19	12
560	1	1004	77	37.5	85	50	14	11	0	59	2281.83	18	13
561	0	1004	89	75.6	180	60	21	9	9	19	1706	11	53
562	0	1005	61	74.175	172.5	60	9	7	17	35	3005	10	37
563	0	1005	89	65.1	155		2		8	26	3967.5	8	46
564	0	1005	77	105	272.5		10		7	23	6172.5	9	49
565	1	1005	61	31.175	80		8		17	63	5078.4	24	9
566	1	1006	17	38.75	97.5		13		2	34	3360	36	38
567	1	1006	17	38.75	105		28		2	64	6676.22	21	8
568	1	1006	7	42.5	110	50	17	11	4.15385	63	3024	32	9
569	1	1006	35	50	122.5	50	25	7	11.3385	57	3216	24	15
570	1	1006	35	60	147.5	50	38	6	16	43	3035	11	29
571	0	1006	17	47.5	120	50	30	11	18.1978	69	3312	24	3
572	1	1006	7	42.5	110	50	14	10	12.5538	68	3264	35	4
573	1	1006	35	57.5	147.5	50	34	10	12	56	3560	15	16
574	1	1006	35	57.5	147.5	50	37	7	0	43	2750	12	29
575	1	1006	35	57.5	147.5	50	39	5	14	36	2750	10	36
576	1	1006	35	57.5	147.5	60	37	7	2	38	2736.67	12	34
577	1	1006	17	41.25	105	60	19	5	7.97802	66	3168	30	6
578	1	1006	17	38.75	97.5		12		17	44	4280	7	28
579	1	1006	7	45	110		2		5	17	1866.25	8	55
580	1	1006	7	40	97.5		7		13	44	4300	8	28
581	1	1006	7	37.5	97.5		11		18	51	4937.5	8	21
582	1	1009	56	46.25	98.75		16		2	32	3120	29	40
583	1	1009	56	35.625	98.75		20		1	37	3686.67	17	35
584	1	1009	9	29.25	70	50	12	12	14	62	2093.33	20	10
585	1	1009	0	90	197.5	50	32	5	1	39	4027.5	22	33
586	1	1009	56	31.25	73.75	50	15	13	22.5	65	3120	30	7
587	1	1009	56	54.375	148.75	50	20	8	4.04396	36	2208	25	36
588	1	1009	56	35	80	60	15	13	28.1538	61	2928	30	11
589	1	1009	56	43.875	98.75		6		14	60	5953.44	18	12
590	0	1011	0	56	147.5		8		0	34	4980	16	38
591	0	1011	63	20.625	60		33		0	33	2002	16	39
592	0	1011	63	20.625	60		33		1	66	3948	16	6
593	0	1011	24	56.875	195		35		0	38	7342.5	14	34
594	0	1011	30	40.25	97.5		12		31	50	4880	12	22
595	0	1011	24	65.875	170	50	12	7	1	48	4680	12	24
596	0	1011	24	65.875	170	50	12	7	0	58	4400	12	14
597	0	1011	4	48.5	121.25	50	34	7	9	57	3235	15	15
598	0	1011	4	28.5	71.25	50	34	7	39	70	2173.33	15	2
599	0	1011	24	50.375	195	50	35	9	12	71	4746.67	14	1
600	0	1011	24	71.4	170	50	17	4	18	48	5005	7	24
601	0	1011	0	32	80	50	9	10	9	62	2100	15	10
602	0	1011	96	67	167.5	50	17	4	16	39	3670	7	33
603	0	1011	24	46.2	110	50	17	4	21	45	2483.33	7	27
604	0	1011	65	66	220	50	37	7	10	49	5287.5	12	23
605	0	1011	83	65	160	50	37	8	16	49	4050	12	23
606	0	1011	83	75	180	50	34	11	15	54	4371.67	15	18
607	0	1011	24	75.85	185		41		8	24	4440	8	48
608	0	1011	65	59	147.5		2		7	23	3405	8	49
609	0	1011	24	69.7	170		41		15	32	5362.5	8	40
610	0	1011	24	49.2	120		41		11	35	4190	8	37
611	0	1011	65	69	172.5		29		5	11	1976.25	8	61
612	0	1011	96	63.75	160		2		14	38	6090	8	34
613	0	1011	65	49	122.5		29		11	26	3202.5	8	46
614	0	1011	65	59	147.5		2		18	38	5605	8	34
615	0	1011	65	74	185		29		13	43	7997.5	8	29
616	0	1011	4	28.5	71.25		29		17	46	3267.5	8	26
617	0	1011	65	69	172.5		7		20	47	8117.5	8	25
618	0	1011	24	71.4	170		7		22	48	8197.5	8	24
619	0	1011	63	46.25	97.5		37		18	42	4052.5	8	30
620	0	1011	24	75.85	185		40		18	40	7352.5	9	32
621	0	1011	24	59.45	145		40		17	36	5247.5	9	36
622	1	1001	38	66.375	147.5		35		17	65	9566.67	19	8
623	1	1009	9	47.5	98.75		19		15	70	6912	35	4
624	1	1001	38	110.25	245		35		0	42	10360	19	33
625	1	1006	35	42.5	110	50	31	6	13	64	2932.5	18	11
626	1	1006	7	47.5	122.5	50	19	9	12.4835	71	3408	30	4
627	1	1011	85	67.825	172.5		45		11	27	4707.5	9	48
628	1	1006	14	52.5	170		12		2	19	3312	37	57
629	1	1006	17	38.75	97.5	50	19	6	6.81319	62	2976	30	14
630	1	1006	10	35	95	50	25	7	11.2308	73	3504	24	3
631	1	1009	0	45	97.5	50	32	9	2	50	2491.67	22	26
632	0	1011	83	45	110	50	35	10	16	57	2873.33	14	19
633	1	1011	85	54.625	140	50	15	6	17	46	3000	9	30
634	0	1011	65	79	197.5		2		5	14	2732.5	8	62
635	1	1006	7	47.5	122.5	60	36	8	18	56	2966.67	13	21
636	1	1009	9	47.25	110		19		2	28	3072	26	49
637	1	1009	78	32.1	80	60	17	15	20.9231	68	3135.78	28	9
638	1	1001	38	100.125	222.5		6		9	48	10630	13	30
639	0	1005	89	81.9	195	60	8	8	16	35	3477.5	11	43
640	0	1005	77	120	297.5		11		5	13	3745	8	65
641	0	1005	77	120	297.5		10		6	16	4772.5	9	62
642	1	1006	35	42.5	110	50	34	7	0	50	3670	15	28
643	1	1009	9	35	105	50	22	6	3.21429	65	3120	23	13
644	0	1011	81	81.5	197.5	50	35	9	0	43	3862.5	14	35
645	0	1011	81	62.5	147.5	50	34	10	18	56	4225	15	22
646	0	1011	63	46.25	97.5	50	32	5	31	55	2755	9	23
647	0	1011	96	72	180	60	20	5	7	21	2249.86	8	57
648	0	1011	24	65.6	160		41		11	30	4750	8	48
649	0	1011	24	69.7	170		41		13	38	6502.5	8	40
650	0	1006	90	40	120	50	31	6	9.62637	73	3504	23	6
651	1	1009	53	38.5	122.5	50	15	10	17.6703	67	3216	34	12
652	1	1009	53	38.5	122.5	60	16	9	19.6923	64	3072	33	15
653	1	1001	38	43.875	97.5	50	3	6	33	72	3776.67	16	8
654	1	1001	31	83.75	172.5	50	33	8	13	59	5038.33	21	21
655	1	1001	38	66.375	147.5	50	7	9	0	44	3510	12	36
656	1	1004	89	60.9	145	50	32	5	0	49	3357.5	17	31
657	1	1009	53	32.5	72.5	50	15	9	6.94505	79	2909.88	34	1
658	1	1009	9	47.5	98.75		24		19	78	7680	30	2
659	1	1011	85	35.025	90	50	10	9	0	57	3082.5	14	23
660	1	1011	85	47.5	122.5	60	9	12	31	61	3700	15	19
661	1	1001	31	108.75	222.5		4		2	14	3072	28	67
662	1	1006	17	41.25	105	60	19	5	33	78	3744	30	3
663	1	1006	7	50	122.5		2		5	13	1588.75	8	68
664	1	1009	76	70	145		4		4	25	3696	41	56
665	1	1009	56	16.875	48.75	50	21	11	27.6923	80	2764.8	33	1
666	1	1009	9	47.5	98.75		25		14	77	7584	29	4
667	1	1011	85	47.5	122.5	50	10	11	13	63	3618.33	14	18
668	1	1001	38	88.875	197.5		13		14	55	10772.5	19	27
669	1	1006	17	46.25	122.5		29		0	37	4526	20	45
670	1	1006	7	77.5	197.5	50	19	6	3.51648	34	3072	30	48
671	0	1011	63	23.5	122.5		46		8	21	2567.5	8	61
672	1	1006	7	42.5	122.5	50	15	9	6.42857	65	3120	34	18
673	1	1006	17	46.25	122.5	50	26	6	14	79	3680	19	4
674	1	1009	56	43.125	100	50	32	4	16	68	2970	22	15
675	1	1009	82	33.75	95	50	17	15	23.6923	77	3696	32	6
676	1	1009	9	57.5	120		35		26	80	9621.36	19	3
677	0	1011	50	55	130	50	36	9	2	67	4802.5	13	16
678	0	1011	24	77.7	185	50	11	8	11	59	6360	13	24
679	0	1011	24	42.5	110	50	12	7	14	54	3467.5	12	29
680	1	1011	85	75.625	185	50	6	13	45	74	7905	18	9
681	0	1011	81	54.375	147.5	60	34	10	37	80	4911.67	15	3
682	0	1011	38	67.5	190		7		7	16	3082.5	8	67
683	0	1011	24	159.6	420		41		14	46	19432.5	8	37
684	1	1001	38	60.75	135		2		8	39	5317.5	17	45
685	0	1004	89	65.1	155		17		0	30	4677.5	15	54
686	0	1005	77	130	322.5	60	6	10	0	16	3323.81	13	68
687	1	1006	10	27.5	85		13		6	42	3552	36	42
688	1	1006	17	71.25	172.5	50	34	7	12	64	7407.5	15	20
689	1	1006	17	37.5	97.5	50	32	4	2	81	3092.5	17	3
690	1	1006	17	56.875	145	50	12	12	16.4835	55	3600	37	29
691	1	1006	7	45	110	50	37	7	22	75	3711.67	12	9
692	1	1006	35	65	147.5		34		18	44	6510	7	40
693	1	1006	14	55	170		2		9	23	3900	8	61
694	1	1009	9	45	105	50	17	6	8.34066	69	3312	28	15
695	1	1009	9	47.25	110	60	12	20	35.1154	83	3984	33	1
696	1	1009	9	42.5	90		13		12	72	6491.16	19	12
697	0	1011	63	20.625	60		33		1	42	2532	16	42
698	0	1011	63	20.625	60		33		12	58	3452.5	16	26
699	0	1011	24	53.125	140		12		0	34	4820	12	50
700	0	1011	96	40	100	50	34	10	20	75	4802.5	15	9
701	0	1011	30	71.3	172.5	50	14	5	30	52	4265	10	32
702	0	1011	24	69.625	195	50	21	4	12	39	4735	7	45
703	0	1011	24	60.9	145	50	13	8	25	67	4983.33	11	17
704	0	1011	30	50.6	122.5	50	13	6	24	57	3432.5	11	27
705	0	1011	96	72	180	50	36	5	0	39	3132.5	13	45
706	0	1011	83	70	170	60	34	11	20	58	4565	15	26
707	0	1011	11	126	300		37		4	13	3870	8	71
708	0	1011	30	60.95	147.5		7		5	11	1661.25	8	73
709	0	1011	24	100.45	245		41		14	33	8057.5	8	51
710	0	1011	4	21.375	71.25		2		13	39	2760	8	45
711	0	1011	30	71.3	172.5		7		17	41	7042.5	8	43
712	0	1011	24	46.2	110		7		16	38	4147.5	8	46
713	0	1011	30	81.65	197.5		7		18	43	8397.5	8	41
714	0	1011	24	46.2	110		7		18	43	4682.5	8	41
715	0	1011	24	46.2	110		7		23	55	6080	8	29
716	0	1011	38	54.375	155		6		6	13	1975	9	71
717	0	1011	65	64	160		6		13	37	5840	9	47
718	1	1006	14	46.875	145	50	25	7	18.4615	84	4032	29	1
719	1	1006	17	41.25	105	60	18	6	17.1429	78	3744	31	7
720	1	1009	56	40	90	50	15	17	29.6154	77	3696	30	8
721	1	1009	76	37.5	80		6		0	35	2798	18	50
722	1	1009	9	22.5	50		36		36	79	3930	18	7
723	0	1011	81	36.75	97.5	50	15	4	24	70	3427.5	9	16
724	0	1011	24	32	90	50	32	12	1	67	2441.67	17	19
725	1	1006	10	35	95	50	33	8	0	75	2645	16	12
726	1	1009	9	22.5	50		35		41	82	4075	19	5
727	0	1011	63	58.75	122.5		41		16	46	5677.5	8	41
728	1	1001	38	77.625	172.5	50	31	10	17.011	46	4128	23	42
729	1	1001	31	132.5	295	50	15	4	31	68	11140	17	20
730	1	1006	17	41.25	110		20		2	36	3984	29	52
731	1	1006	7	40	97.5		28		29	64	6240	21	24
732	1	1006	17	54.375	122.5	60	11	13	30.7692	70	3840	38	18
733	1	1006	7	42.5	110		10		6	15	1666.25	9	73
734	1	1009	56	43.125	95	50	32	4	0	57	2830	22	31
735	0	1011	38	22.5	85	50	16	5	28	75	2565	8	13
736	1	1006	7	50	122.5		29		0	38	4677.5	20	51
737	1	1006	14	60	170	50	17	11	9.67033	60	3840	32	29
738	1	1009	9	56.25	130	50	3	21	15.4286	58	3744	42	31
739	1	1009	82	33.75	95	60	19	14	8.96703	68	2996.08	26	21
740	1	1009	9	47.5	98.75		35		15	72	7065	19	17
741	1	1001	31	145	295		23		12	31	9092.5	9	59
742	1	1006	35	42.5	110		34		0	28	3095	15	62
743	0	1006	17	45	120	50	26	6	12.3077	80	3840	23	10
744	1	1006	17	55.625	122.5	50	36	5	23	78	4485	13	12
745	1	1006	7	45	110		2		19	42	4575	8	48
746	0	1011	81	43.5	147.5	50	16	9	37	82	6023.33	12	8
747	0	1011	83	52.5	130	50	34	11	13	60	4195	15	30
748	0	1011	83	52.5	130	60	34	11	8	56	3497.1	15	34
749	0	1011	83	85	205	60	34	11	30	75	7263.33	15	15
750	0	1011	63	118.125	395		41		10	26	10237.5	8	64
751	1	1006	7	40	97.5		7		17	57	5577.5	8	34
752	1	1006	7	42.5	110		6		6	18	2025	9	73
753	1	1009	78	78.75	212.5		34		13	70	14975	20	21
754	1	1001	31	83.75	172.5		14		10	61	10476.3	18	31
755	1	1009	56	17.825	48.75	50	20	12	35	91	3240.58	34	1
756	1	1006	17	38.75	97.5	50	14	10	22.9451	87	4176	35	6
757	1	1006	17	37.5	97.5	50	28	8	0	54	2692.5	17	39
758	1	1006	14	34.375	95	50	20	8	17.8022	90	4320	29	3
759	1	1006	17	57.5	147.5	50	23	9	15.6484	69	4272	26	24
760	1	1009	78	74.25	170	50	32	13	35	77	6455	17	16
761	1	1009	53	100	222.5		6		6	20	4426.25	9	73
762	1	1009	9	22.5	50		35		43	86	4287.5	19	7
763	0	1011	30	43.75	97.5	50	12	7	40	79	4955	12	14
764	1	1001	31	108.75	222.5		32		12	72	16053.4	22	22
765	0	1003	84	16.25	60	50	21	16	12.2637	93	3006.33	33	1
766	1	1006	7	37.5	97.5		17		4	42	4128	32	52
767	1	1006	35	57.5	147.5		25		3	30	4416	24	64
768	1	1006	7	47.5	122.5	60	22	10	28.3846	82	3936	27	12
769	0	1011	24	90.2	220		41		13	28	6252.5	8	66
770	1	1001	31	83.75	172.5	50	29	12	31.8462	52	4416	25	43
771	0	1003	28	31.25	80		29		8	28	2271.67	20	67
772	0	1004	3	60	170		24		7	22	3671.25	8	73
773	0	1006	17	40	97.5		10		11	28	2747.5	9	67
774	1	1009	9	65	135	50	32	4	20	84	5542.5	22	11
775	0	1011	38	45	130	50	11	8	22	76	5685	13	19
776	0	1011	96	78	195		46		6	13	2580	8	82
777	0	1011	24	69.7	170		40		16	38	6440	9	57
778	0	1011	24	79.95	195		40		3	57	11102.5	9	38
779	1	1001	31	83.75	172.5		35		9	41	7096.67	14	55
780	1	1001	31	58.75	122.5	50	24	4	21	55	3792.5	8	41
781	1	1001	38	88.875	197.5	50	6	10	38	83	7721.67	13	13
782	0	1003	61	19.375	60		10		0	41	2442	18	55
783	1	1004	89	71.4	170		13		1	19	3180	19	77
784	0	1004	89	81.9	195	60	18	9	16	70	5735	14	26
785	0	1004	89	54.6	130	60	17	10	20	65	3835	15	31
786	1	1006	35	42.5	110	50	31	6	1	55	2500	18	41
787	1	1006	17	36.25	97.5	50	37	7	0	62	2575	12	34
788	1	1006	7	37.5	97.5		2		7	16	1528.75	8	80
789	1	1006	7	50	122.5		2		17	38	4700	8	58
790	1	1006	7	40	97.5		11		9	32	3085	8	64
791	1	1006	7	45	110		2		11	28	3097.5	8	68
792	1	1006	7	40	97.5		2		6	46	4502.5	8	50
793	1	1009	53	67.5	147.5		11		7	23	3408	38	73
794	1	1009	9	30.875	98.75	50	19	5	11.2	91	4368	26	5
795	1	1009	9	22.5	55	50	17	11	34.2308	89	3077.07	28	7
796	0	1011	96	49.5	137.5	50	14	5	28	62	4755	10	34
797	0	1011	96	49.5	137.5	50	13	6	25	60	4430	11	36
798	0	1011	30	33.35	80	50	20	5	33	78	2725	8	18
799	0	1011	96	49.5	137.5	50	13	6	23	60	5032.5	11	36
800	0	1011	24	29.4	70	50	14	7	22	64	1933.33	10	32
801	0	1011	96	49.5	137.5	50	12	7	0	63	3681.67	12	33
802	1	1011	85	50	122.5	60	6	13	37	72	5198.33	18	24
803	0	1011	30	38.5	122.5		2		8	22	2660	8	74
804	0	1011	24	56.7	135		2		11	27	3600	8	69
805	0	1011	24	77.7	185		7		7	17	3132.5	8	79
806	0	1011	4	43.875	146.25		2		6	22	3205	8	74
807	0	1011	30	37.375	90		7		18	47	4252.5	8	49
808	0	1011	30	71.3	147.5		7		7	25	3635	8	71
809	0	1011	30	60.95	147.5		2		16	34	4952.5	8	62
810	0	1011	24	60.9	145		7		9	24	3542.5	8	72
811	0	1011	24	90.2	220		41		21	47	10357.5	8	49
812	1	1011	85	80.625	197.5		33		18	44	8612.5	8	52
813	1	1011	85	80.625	197.5		33		21	63	12347.5	8	33
814	0	1011	38	75	215		6		6	19	4027.5	9	77
815	0	1011	24	81.9	210		6		9	30	6217.5	9	66
816	1	1011	85	36	97.5		19		6	20	1922.5	9	76
817	0	1011	81	54.375	147.5		28		6	17	2503.75	9	79
818	0	1011	38	61.875	172.5		6		7	17	2938.75	9	79
819	1	1001	31	65	135	50	18	10	2	61	4058.33	14	36
820	1	1004	89	81.9	195	50	32	5	19	96	8567.5	22	1
821	1	1006	10	32.5	90		16		5	50	4464	33	47
822	0	1006	17	36.25	97.5	50	34	7	1	64	3217.5	20	33
823	1	1009	82	52.9	120	50	19	5	4.23077	67	3696	26	30
824	1	1001	31	157.5	320	50	36	9	15	59	10793.3	18	39
825	1	1001	31	65	135	60	24	4	20	52	3777.5	8	46
826	1	1006	35	32.5	90		34		0	34	3025	15	64
827	1	1009	9	57.5	120		35		31	96	11523.6	19	2
828	1	1001	31	120	245	50	19	9	0	30	4792.2	13	69
829	1	1004	45	50	110	50	32	17	25	93	5830	22	6
830	1	1006	17	38.75	97.5	50	15	9	3.65934	74	3552	34	25
831	0	1006	17	36.25	110	50	40	4	19	88	4050	14	11
832	1	1006	10	40	110		2		15	36	3945	8	63
833	0	1011	63	23.5	122.5		47		15	39	4757.5	7	60
834	1	1001	31	108.75	222.5	50	24	4	17	49	5802.5	8	51
835	1	1006	7	52.5	147.5		37		1	41	6020	12	59
836	1	1006	14	60	160	50	33	12	19	89	6301.67	21	11
837	1	1006	10	37.5	120	50	28	4	2	85	3510	21	15
838	1	1006	10	40	110		2		10	27	2980	8	73
839	0	1011	38	61.875	172.5		12		0	35	5992.5	12	65
840	1	1011	85	72.65	185		46		29	64	11922.5	8	36
841	0	1011	81	123.9	297.5		28		18	39	11465	9	61
842	1	1001	38	88.875	197.5	60	23	9	10.5846	46	4128	26	55
843	0	1003	28	31.25	80	50	29	8	2	93	3507.5	20	8
844	1	1006	10	32.5	95		7		10	86	8141.02	42	15
845	0	1006	17	38.75	97.5	50	21	7	9.79121	99	4752	33	2
846	1	1006	35	40	97.5	50	31	6	2	58	2700	18	43
847	1	1006	7	37.5	97.5		10		12	40	3885	9	61
848	1	1001	38	43.875	97.5		22		3	50	4848	32	52
849	1	1004	77	90	222.5		12		0	21	4662.5	20	81
850	1	1004	77	110	272.5	60	13	8	0	36	4767.5	19	66
851	0	1004	61	84.925	197.5		32		16	36	7062.5	9	66
852	1	1006	35	57.5	147.5	50	30	7	1	95	5530	19	7
853	1	1006	7	37.5	97.5		7		7	17	1633.75	8	85
854	1	1006	7	37.5	97.5		7		19	42	4057.5	8	60
855	1	1006	7	37.5	97.5		10		8	26	2567.5	9	76
856	1	1006	7	37.5	97.5		10		15	49	4777.5	9	53
857	1	1009	82	41.4	95		32		0	42	3988	22	60
858	0	1011	83	75	180	60	34	11	1	56	4660.74	15	46
859	0	1011	81	23.875	80	60	35	9	51	100	2923.33	19	2
860	0	1011	24	90.2	220		41		14	45	9912.5	8	57
861	1	1001	38	66.375	147.5		5		1	52	7645	14	51
862	0	1003	84	16.25	60	50	21	16	17.8022	90	3027.09	28	13
863	0	1004	61	84.925	197.5		32		6	15	2876.25	9	88
864	1	1006	7	52.5	135		7		6	22	2980	8	81
865	1	1009	9	57.5	120		35		27	92	11016	19	11
866	1	1001	38	49.5	110	50	6	10	16	75	4131.67	13	29
867	0	1003	97	25	80		7		0	22	1745.33	21	82
868	1	1006	7	57.5	147.5	50	22	10	14.3077	73	4464	27	31
869	0	1011	65	54	135		29		25	61	8180	8	43
870	1	1006	7	40	97.5	50	24	4	1	100	4342.5	21	5
871	1	1006	17	38.75	97.5	50	15	9	5.54945	101	4848	34	4
872	1	1009	78	61.875	170		32		13	80	13630	22	25
873	1	1009	82	43.125	120	50	19	9	35.7692	93	4464	26	12
874	0	1011	24	60.7	170	50	21	4	30	66	5603.33	7	39
875	1	1001	38	77.625	172.5		12		9	41	7102.5	20	65
876	1	1001	38	66.375	147.5	50	19	9	36	88	6505	13	18
877	0	1003	84	16.25	60	50	21	16	5.56044	92	2874.13	28	14
878	1	1005	61	36.55	85		6		10	49	4176	26	57
879	0	1005	89	81.9	195	60	7	9	12	55	5187.23	12	52
880	1	1006	7	57.5	147.5		28		1	62	9140	21	45
881	1	1006	7	50	122.5	50	14	10	30.1538	88	4704	35	19
882	1	1006	7	40	97.5	50	18	10	39.6154	103	4944	31	4
883	1	1006	17	42.5	110	60	26	6	18.1099	103	4944	23	4
884	1	1006	7	42.5	110		11		7	15	1631.25	8	92
885	1	1009	9	22.5	50		35		50	99	4972.5	19	8
886	0	1011	81	47.5	130	50	15	6	35	77	4410	9	30
887	0	1011	65	98	245	50	19	6	19	64	7528.33	9	43
888	0	1011	96	40	100	60	34	10	40	98	4445	15	9
889	0	1011	24	59.05	160		29		12	29	4717.5	8	78
890	1	1001	31	75.375	172.5		15		0	29	5050	17	79
891	1	1001	38	38.25	85		17		21	72	6082.43	15	36
892	1	1001	38	66.375	147.5		6		30	74	10893.3	13	34
893	0	1003	48	17.5	60		7		19	67	4040	17	41
894	1	1006	7	50	122.5		24		5	80	9792	25	28
895	1	1006	17	40	105		24		2	35	3648	25	73
896	0	1006	17	32.5	90	50	21	7	21.1648	107	5136	33	1
897	1	1006	35	57.5	147.5	50	38	6	20	58	4290	11	50
898	1	1006	7	57.5	172.5	50	36	8	42	82	7660	13	26
899	1	1006	7	45	110		6		15	40	4355	9	68
900	0	1011	24	77.7	185	50	12	7	2	84	7146.67	12	24
901	0	1011	30	56.35	135	50	13	6	32	84	7520	11	24
902	0	1011	38	30	105	50	15	6	27	88	3911.67	9	20
903	0	1011	65	68	170	50	19	6	20	54	5167.5	9	54
904	0	1011	24	33.6	80	50	14	7	37	72	2686.67	10	36
905	0	1011	38	30	90	50	11	8	50	98	5095	13	10
906	0	1011	81	54.375	147.5		2		10	20	2902.5	8	88
907	1	1011	85	76.6	197.5		29		14	37	7222.5	8	71
908	0	1011	4	36.375	121.25		2		10	34	4065	8	74
909	0	1011	65	69	172.5		36		6	15	2572.5	9	93
910	0	1003	48	17.5	60	60	7	9	13.0462	106	2826.81	42	3
911	1	1006	14	55	170	50	13	11	14.1099	87	5136	41	22
912	1	1006	17	37.5	97.5	50	20	8	13.5824	103	4944	29	6
913	1	1006	17	37.5	97.5	50	20	8	19.7802	100	4800	29	9
914	1	1001	31	46.25	97.5	50	6	10	23.0769	105	5040	26	5
915	0	1006	17	35	97.5	50	23	5	6.22527	103	4944	31	7
916	1	1006	17	53.125	122.5	50	25	7	4.94505	90	4800	24	20
917	1	1006	17	46.25	122.5	50	24	8	5.8022	96	4608	25	14
918	0	1004	61	84.925	197.5	50	34	7	27	89	9365	11	22
919	1	1006	7	57.5	147.5	50	29	7	28	105	6396.67	20	6
920	1	1006	10	32.5	90		11		8	26	2323.75	8	85
921	1	1006	7	67.5	172.5		46		13	43	7492.5	8	68
922	1	1009	78	59.375	130	50	19	5	2.76923	36	2688	26	75
923	1	1009	78	35	100	50	19	9	27.1648	103	4944	26	8
924	1	1009	9	22.5	50		31		24	107	5328	23	4
925	0	1011	24	39.275	110	50	20	5	41	90	4201.67	8	21
926	1	1001	31	71.25	147.5		7		4	62	9120	25	50
927	1	1006	35	42.5	110	50	25	8	16.7033	95	4560	24	17
928	1	1006	7	37.5	97.5	50	17	11	18.6462	101	4848	32	11
929	1	1006	17	38.75	97.5		11		18	45	4435	8	67
930	1	1009	53	70	222.5		15		3	41	9216	34	71
931	1	1009	78	35	100	50	19	9	8.26374	94	4512	26	18
932	1	1009	78	35	100	50	19	9	8.43956	96	4608	26	16
933	1	1009	82	37.5	110		19		7	18	2030	9	94
934	1	1009	9	22.5	50		25		19	108	5376	29	4
935	1	1006	7	45	110		14		5	86	9408	35	27
936	1	1006	10	30	85		14		8	63	5376	35	50
937	1	1006	17	53.75	145	60	39	5	31	82	4903.33	10	31
938	1	1001	38	43.875	97.5	50	17	11	19	82	3775	15	32
939	1	1001	38	88.875	197.5	50	23	9	32.6154	56	5088	26	58
940	0	1003	84	16.25	60	50	21	16	4.89011	89	3278.18	28	25
941	0	1003	28	31.25	80	50	29	8	60	108	3897.5	20	6
942	0	1003	84	16.25	60	50	21	16	14.5385	105	3403.26	28	9
943	0	1003	56	30	80		16		8	28	2208.33	12	86
944	1	1006	35	50	122.5	50	33	8	0	76	6432.5	16	38
945	1	1006	35	40	97.5	50	34	7	1	53	3415	15	61
946	1	1009	56	31.875	90	50	32	5	2	113	4200	22	1
947	1	1009	9	26.25	73.75		24		24	63	4622.5	8	51
948	1	1009	9	22.5	50		28		26	108	5424	26	6
949	0	1011	96	35	87.5	50	8	11	18	99	4035	16	15
950	0	1011	38	39	140	50	19	6	20	66	5731.04	9	48
951	0	1011	24	66.05	185	50	19	6	23	55	6152.5	9	59
952	0	1011	96	34.2	95	50	12	7	27	100	3955	12	14
953	0	1011	83	37.5	95	50	35	10	1	81	3135	14	33
954	0	1011	83	45	110	60	33	12	22	81	3680	16	33
955	0	1011	50	82.5	197.5		37		9	11	2270	8	103
956	0	1011	24	59.5	170		41		17	50	8417.5	8	64
957	0	1011	96	75	180		7		22	58	10437.5	8	56
958	1	1001	31	108.75	222.5	50	3	8	16.4615	47	5136	29	68
959	1	1001	31	96.25	197.5		15		10	48	9420	17	67
960	1	1006	7	37.5	97.5		18		3	51	4944	31	64
961	1	1006	7	47.5	122.5	50	37	7	51	83	5220	12	32
962	1	1006	17	43.75	120		45		7	21	2500	9	94
963	1	1009	82	64.4	145	50	32	9	15	84	5981.67	13	31
964	1	1009	56	67.5	148.75	50	32	13	53	104	8111.67	17	11
965	1	1009	9	47.5	98.75		19		20	112	11040	35	3
966	1	1001	31	83.75	172.5	50	22	8	20.4923	61	5328	32	55
967	1	1001	38	43.875	97.5	50	23	9	20.2198	115	5520	31	1
968	1	1001	31	108.75	222.5		7		45	98	21795	8	18
969	0	1004	61	84.925	197.5	50	32	9	1	87	7426.67	13	29
970	0	1011	65	58	145		29		19	46	6695	8	70
971	1	1001	38	88.875	197.5	50	23	7	7.38462	52	5376	26	65
972	1	1001	38	38.25	85	60	23	9	52.6154	114	5472	26	3
973	1	1006	7	42.5	110	50	15	9	16.9231	100	4800	34	17
974	1	1006	7	47.5	122.5	50	16	8	5.09341	103	4944	33	14
975	0	1006	90	33.75	95		2		12	32	3047.5	8	85
976	1	1009	78	38.525	95		17		2	49	4608	28	68
977	1	1009	53	67.5	147.5		6		10	29	4252.5	9	88
978	1	1009	9	22.5	50		25		22	112	5616	29	5
979	1	1009	9	47.5	98.75		19		30	114	11232	35	3
980	0	1011	24	31.875	110	50	11	8	2	109	4856.67	13	8
981	0	1003	9	18.75	60	50	31	10	24.8352	113	4337.56	23	5
982	0	1004	61	84.925	197.5	50	32	9	25	102	10672.5	13	16
983	1	1006	17	37.5	97.5	50	35	6	1	73	3255	14	45
984	1	1006	7	45	110	50	28	8	31	98	5425	21	20
985	1	1006	7	45	110	50	18	10	20.6769	112	5376	31	6
986	1	1006	7	47.5	122.5	50	28	8	0	84	4210	21	34
987	0	1006	90	30	85		11		6	45	3845	8	73
988	1	1009	9	63	145	50	12	16	33.8462	80	5280	33	38
989	0	1011	65	78	195	50	11	8	1	85	6860	13	33
990	0	1011	24	50.375	170	60	35	9	68	111	6973.33	14	7
991	1	1001	38	43.875	97.5		24		16	112	10944	25	7
992	1	1001	38	38.25	85	50	23	9	46.5385	110	5280	26	9
993	0	1003	61	19.375	70		13		0	39	2720	15	80
994	0	1003	91	24.375	80		33		6	17	1377.5	8	102
995	1	1006	35	37.5	97.5	50	37	4	0	83	4942.5	12	36
996	0	1006	17	37.5	97.5	50	35	6	2	79	3475	19	40
997	1	1006	17	42.5	110	50	35	6	34	107	5452.5	14	12
998	0	1006	17	56.875	145	50	26	6	10.2857	97	5616	28	22
999	1	1006	7	45	110		10		17	45	5000	9	74
1000	1	1009	56	52.5	145	50	32	16	19	96	6986.67	22	23
1001	1	1009	56	37.5	90		6		1	61	5478	18	58
1002	1	1009	9	47.5	98.75		19		15	58	5712	35	61
1003	0	1011	38	52.5	147.5	50	11	8	0	72	6487.5	13	47
1004	0	1011	24	60.9	145	50	17	4	16	38	2920	7	81
1005	0	1011	24	46.2	110	50	16	5	35	102	5573.33	8	17
1006	1	1001	31	52.5	110	50	24	4	28	93	5312.5	8	27
1007	0	1003	61	19.375	60		13		1	62	3720	15	58
1008	0	1003	61	19.375	60		12		10	62	3747.5	16	58
1009	0	1003	43	23.75	70	50	30	11	2	119	3375	19	1
1010	0	1003	97	24.375	80	50	7	9	2	116	3176.67	21	4
1011	0	1003	61	19.375	70	50	13	6	1	101	2521.67	15	19
1012	0	1003	92	16.875	70	50	27	14	23	114	2751.67	22	6
1013	0	1003	97	22.5	80	50	7	9	1	109	2508.33	21	11
1014	0	1003	30	37.5	95		12		23	85	8060	16	35
1015	0	1003	30	37.5	95		12		0	22	2108	16	98
1016	0	1003	30	37.5	95		12		10	39	3675	16	81
1017	0	1003	2	25	80		16		18	62	4933.33	12	58
1018	0	1003	56	30	80		16		0	20	1636	12	100
1019	0	1003	91	24.375	80		33		13	43	3410	8	77
1020	1	1005	7	60.375	172.5	60	2	14	2	56	3708.68	17	64
1021	1	1006	10	27.5	85		12		6	58	4944	37	62
1022	1	1006	35	42.5	110		34		1	39	4332.5	15	81
1023	1	1006	7	57.5	147.5		29		1	64	9505	20	56
1024	1	1006	35	57.5	147.5		31		0	34	5025	18	86
1025	1	1006	17	41.25	110	50	37	7	19	88	5067.5	12	32
1026	1	1006	35	50	122.5	50	34	10	1	77	3941.67	15	43
1027	1	1006	35	47.5	122.5	60	37	7	0	49	2682.85	12	71
1028	1	1006	7	42.5	110	60	22	8	6.58791	109	5173.26	27	11
1029	1	1006	17	38.75	97.5		11		27	61	5960	8	59
1030	0	1006	17	32.5	90		2		13	31	2747.5	8	89
1031	0	1006	17	33.75	85		2		18	39	3285	8	81
1032	1	1009	78	29.95	75	50	18	7	6.04396	110	5280	27	10
1033	1	1009	82	47.5	98.75	50	32	9	1	46	2223.16	13	74
1034	1	1009	9	36	95	50	13	15	45.6923	108	5184	32	12
1035	1	1009	82	33.75	95		20		10	27	2580	8	93
1036	1	1009	9	36	95		13		17	91	8680	19	29
1037	0	1011	96	43.5	120	50	11	8	2	88	5847.5	13	32
1038	0	1011	24	40.375	105	50	12	7	33	112	6432.5	12	8
1039	0	1011	24	50.4	120	50	13	6	38	92	5855	11	28
1040	0	1011	96	36.675	95	50	12	7	1	65	3125.59	12	55
1041	0	1011	96	34.7	95	50	12	7	1	51	2227.94	12	69
1042	0	1011	4	48.5	121.25	50	34	7	46	101	6117.5	15	19
1043	1	1011	85	70.075	180	50	8	13	19	91	8175	16	29
1044	0	1011	38	64.5	225	50	16	5	9	26	3563.44	8	94
1045	0	1011	96	43.5	120	50	11	8	20	98	4993.33	13	22
1046	0	1011	24	67.2	160	50	13	8	16	42	4310	11	78
1047	0	1011	81	122.25	320	60	37	7	28	96	12525	12	24
1048	0	1011	96	39.925	110		7		11	36	3915	8	84
1049	0	1011	81	40.75	110		2		8	17	1867.5	8	103
1050	0	1011	65	48	120		7		24	53	6327.5	8	67
1051	0	1011	38	72.2	205		6		7	20	4172.5	9	100
1052	1	1011	85	70.625	172.5		15		19	56	9715	9	64
1053	1	1006	7	57.5	147.5		15		2	23	3456	34	98
1054	1	1006	14	36.25	110	50	26	6	13.2923	108	5184	28	14
1055	1	1009	82	35.625	100		19		9	20	1975	9	102
1056	1	1001	38	86.25	172.5		11		14	69	11920	21	54
1057	1	1006	17	33.75	85		14		5	60	5088	35	63
1058	1	1006	17	38.75	97.5	60	17	7	5.98352	121	4830.79	32	2
1059	1	1006	10	35	110		7		7	22	2460	8	102
1060	1	1009	56	46.25	98.75		6		21	61	6035	9	63
1061	0	1011	24	39.275	110	50	21	4	38	83	6002.5	7	41
1062	1	1001	31	71.25	147.5	50	6	10	21.956	71	5328	26	54
1063	1	1006	17	37.5	97.5	50	34	7	19	49	3053.12	11	76
1064	1	1006	17	37.5	97.5	50	26	6	1	87	3632.5	19	38
1065	0	1011	38	76.875	215	50	12	7	23	86	11282.5	12	39
1066	0	1011	83	35	85	50	34	11	0	99	3858.28	15	26
1067	0	1003	9	22.5	70		2		10	70	4893.33	17	56
1068	1	1005	55	45	110	60	6	15	42.3077	110	5280	26	16
1069	1	1006	35	42.5	110	50	34	7	0	44	3012.5	15	82
1070	1	1006	7	47.5	122.5	50	32	9	25	115	8240	17	11
1071	1	1006	7	45	110	50	28	8	2	92	4575	21	34
1072	1	1006	7	45	110	50	36	8	1	93	4427.5	13	33
1073	1	1006	17	54.375	145		6		18	47	6752.5	9	79
1074	1	1006	7	50	122.5		10		10	28	3377.5	9	98
1075	0	1011	38	25.5	90	50	20	5	39	102	3811.67	8	24
1076	0	1011	38	25.5	90	50	20	5	32	107	3958.33	8	19
1077	0	1011	38	33	115	50	19	6	44	97	5536.67	9	29
1078	0	1011	24	62.725	170	60	29	15	35	110	6973.33	20	16
1079	0	1011	83	65	160	60	36	9	0	49	3436.16	13	77
1080	0	1011	83	65	160	60	37	8	15	70	5850	12	56
1081	0	1011	83	75	180	60	34	11	1	77	6006.67	15	49
1082	0	1011	38	86.25	240		6		7	26	6127.5	9	100
1083	1	1001	38	144	320	50	12	7	15	94	14356.7	20	34
1084	1	1004	91	59	147.5		32		1	66	9717.5	22	62
1085	1	1011	85	142.5	347.5		37		8	28	9558.75	8	100
1086	1	1001	38	73.75	147.5		38		0	17	2534	16	112
1087	1	1001	31	83.75	172.5		41		37	61	10463.3	13	68
1088	1	1006	35	50	122.5		25		6	47	5712	24	82
1089	1	1006	17	46.25	122.5	50	34	7	1	80	5125	15	49
1090	1	1001	38	100.125	222.5		11		0	51	11304	21	79
1091	1	1001	38	77.625	172.5	50	19	9	2	89	7185	13	41
1092	1	1001	31	71.25	147.5	50	17	11	36	79	8227.5	15	51
1093	1	1006	7	57.5	147.5	50	33	8	0	107	6900	16	23
1094	1	1006	7	47.5	122.5	50	19	9	15.6462	113	5424	30	17
1095	1	1006	35	50	122.5	50	25	7	25.4945	106	5568	24	24
1096	1	1006	7	57.5	147.5	50	28	8	1	83	5068.33	21	47
1097	0	1006	17	33.75	85	60	2	22	35.0769	114	4769.34	46	16
1098	0	1011	81	35.375	97.5	50	4	15	22	111	5723.33	20	19
1099	0	1011	96	70.2	172.5	50	12	7	1	84	7785	12	46
1100	0	1011	65	56	140	50	19	6	30	99	5846.67	9	31
1101	0	1011	24	40.625	130	50	36	8	17	118	5221.67	13	12
1102	1	1011	85	40.5	110		19		11	36	3920	9	94
1103	1	1001	31	58.75	122.5		36		10	52	6311.67	18	79
1104	0	1002	56	33.75	120	50	6	5	25	67	5012.5	9	64
1105	0	1003	18	12.5	45	60	5	14	52.1538	113	3366.43	23	18
1106	1	1006	7	42.5	110	50	14	10	10.9011	124	5952	35	7
1107	0	1011	65	44	110	50	19	6	48	115	5871.67	9	16
1108	1	1001	31	120	240		29		14	26	6288	25	106
1109	0	1003	18	12.5	45	50	5	14	15.5077	126	3530.21	23	6
1110	0	1003	18	12.5	45	60	5	16	48.4615	105	2987.36	23	27
1111	0	1003	43	23.75	70		30		0	27	1889.33	19	105
1112	0	1003	18	12.5	45	60	5	14	53.0769	115	3408.49	23	17
1113	0	1004	3	35	95	60	17	10	14	96	3432.5	15	36
1114	0	1006	17	37.5	97.5	50	30	7	20	112	4517.5	19	20
1115	1	1006	17	54.375	145	50	36	5	1	92	6087.5	13	40
1116	1	1006	35	40	97.5	50	34	10	1	81	3436.67	15	51
1117	1	1009	82	33.75	95	50	19	9	14.1099	107	5136	26	25
1118	1	1009	82	43.7	100	60	17	10	0	49	2345.84	15	83
1119	1	1011	85	67.1	172.5	50	8	13	50	110	9885	16	22
1120	0	1011	24	52.5	125	50	17	4	30	80	5700	7	52
1121	0	1011	24	67.2	160	50	13	8	9	29	3007.5	11	103
1122	0	1011	24	58.8	140	50	13	8	41	88	5690	11	44
1123	0	1011	38	61.875	172.5	50	11	8	13	90	7555	13	42
1124	0	1011	81	122.25	295	50	34	10	0	52	7302.5	15	80
1125	0	1011	50	93.75	222.5	60	37	8	0	62	6633.88	12	70
1126	0	1011	65	78	195	60	17	4	36	87	7375	7	45
1127	0	1011	65	88	220		7		14	35	7655	8	97
1128	0	1011	24	34	90		7		8	28	2520	8	104
1129	0	1011	30	60.95	147.5		7		20	54	8020	8	78
1130	1	1011	85	33.25	85		29		23	63	5340	8	69
1131	1	1011	85	63.575	172.5		19		14	45	7722.5	9	87
1132	0	1011	38	50.625	147.5		6		7	23	3435	9	109
1133	1	1011	85	70.625	172.5		15		23	69	11830	9	63
1134	1	1001	38	43.875	97.5	50	19	9	2	86	4133.33	13	47
1135	1	1009	56	17.825	48.75	50	20	12	50.7692	132	4458.07	34	1
1136	1	1001	38	100.125	222.5		2		40	66	14737.5	17	68
1137	1	1006	7	60	147.5	50	29	7	55	98	9217.5	16	36
1138	0	1006	17	36.25	97.5	50	29	12	22.3385	132	6336	25	2
1139	0	1011	38	49.5	172.5	50	15	6	27	89	9564.78	9	45
1140	1	1001	38	77.625	172.5		14		28	96	16574.5	18	40
1141	1	1001	31	40	85	50	31	6	23.3846	133	6384	23	3
1142	0	1006	17	42.5	110	50	28	5	18.6923	135	6480	26	1
1143	1	1009	53	67.5	147.5		12		5	88	12960	37	48
1144	1	1009	9	36.25	73.75	50	22	10	7.1978	131	5894.91	32	5
1145	1	1009	53	77.5	172.5		6		14	31	5330	9	105
1146	1	1001	31	108.75	222.5	50	29	8	24	30	6240	25	107
1147	1	1006	7	40	97.5		7		25	56	5457.5	8	81
1148	1	1009	9	56	145		32		1	61	8780	17	76
1149	1	1009	9	22.5	50	50	2	22	40.9231	133	4052.41	43	4
1150	0	1011	63	27.5	60	50	32	6	49	99	2951.67	9	38
1151	1	1006	7	42.5	110		15		2	55	6000	34	83
1152	1	1006	17	42.5	110		29		22	48	5310	8	90
1153	1	1006	7	47.5	122.5		10		21	69	8475	9	69
1154	1	1011	85	70.625	172.5	50	8	11	39	95	11492.5	16	43
1155	0	1011	24	46.4	130	50	21	4	17	55	4105	7	83
1156	0	1011	96	31.5	87.5	50	15	6	49	107	4060	9	31
1157	0	1011	24	56.7	135		2		10	21	2775	8	117
1158	0	1011	24	77.5	210		29		11	29	6025	8	109
1159	0	1011	24	46.2	110		2		8	29	3202.5	8	109
1160	1	1011	85	40	97.5		33		10	27	2605	8	111
1161	0	1011	24	86.725	235		29		10	31	7400	8	107
1162	0	1011	63	16	85		46		16	52	4450	8	86
1163	0	1011	96	172	430		40		5	12	5302.5	9	126
1164	1	1011	85	65.625	160		15		25	67	10722.5	9	71
1165	0	1011	81	54.375	147.5		6		24	62	9192.5	9	76
1166	1	1001	31	65	135	50	18	10	14	83	5798.33	14	56
1167	1	1009	56	25	55	50	16	8	23.3407	118	4403.09	29	21
1168	0	1011	96	67	167.5	50	16	5	25	66	7005	8	73
1169	1	1001	38	66.375	147.5		39		38	120	17656.7	15	20
1170	1	1009	78	17.1	45		18		17	124	5601.42	36	16
1171	1	1009	56	23.75	55	50	16	8	22.3297	127	5226.39	29	13
1172	1	1009	56	41.25	115	50	15	13	15.1648	115	5520	30	25
1173	0	1003	34	9.475	24.95	50	28	13	18.6923	135	2317.85	26	6
1174	0	1003	90	34.375	95		12		0	27	2590.67	16	114
1175	1	1004	48	67.5	147.5	60	12	15	39	97	7315	20	44
1176	1	1006	7	45	110		29		0	57	6312.5	20	84
1177	0	1006	17	29.375	85	50	20	8	13.8462	140	6316.15	34	1
1178	1	1009	78	51.35	125	50	18	10	14.7473	112	5856	27	29
1179	1	1011	85	52.25	135		29		12	25	3330	8	116
1180	0	1011	30	46	110		7		16	34	3760	8	107
1181	1	1001	31	96.25	197.5	50	29	8	20	93	9485	20	49
1182	1	1004	36	55	170		32		0	28	4837.5	22	114
1183	1	1006	7	47.5	122.5		15		7	50	6096	34	92
1184	1	1006	17	41.25	105	50	29	4	3	124	5480	20	18
1185	1	1006	7	42.5	110	50	33	8	1	116	4946.67	16	26
1186	1	1006	7	40	97.5		7		28	63	6100	8	79
1187	1	1009	56	43.75	98.75	50	14	10	27.6923	126	6048	31	16
1188	1	1009	56	43.125	120	50	32	9	1	43	3137.5	13	99
1189	1	1009	82	17.8	48.75	50	19	9	28	105	2635	13	37
1190	1	1011	85	38	97.5	50	10	11	1	107	4238.33	14	35
1191	1	1004	89	39.9	95	50	33	12	31	129	6220	21	14
1192	1	1005	61	84.925	197.5		7		9	29	5760	25	114
1193	0	1005	61	34.4	80	50	6	7	14	98	4157.5	13	45
1194	1	1006	17	37.5	97.5	50	28	9	36	111	5695	17	32
1195	1	1006	10	35	95	50	25	7	17.8022	135	6480	24	8
1196	1	1006	17	53.125	122.5	50	20	8	23.7363	115	6480	29	28
1197	1	1006	7	37.5	74.95	50	28	16	80	131	6111.67	21	12
1198	1	1006	17	38.75	97.5		7		14	29	2837.5	8	114
1199	0	1006	17	33.75	90		2		15	51	4627.5	8	92
1200	1	1006	7	42.5	110		10		14	42	4650	9	101
1201	1	1009	56	25	55	50	16	12	13.9077	113	3329.42	29	30
1202	1	1001	31	71.25	147.5	60	24	4	23	51	3790	8	93
1203	0	1003	40	30	95		16		0	25	2344	12	119
1204	0	1003	40	30	95		16		2	68	6413.33	12	76
1205	1	1004	87	22.5	75		17		10	84	6336	32	60
1206	1	1004	48	55	122.5	50	12	9	69	123	7497.5	20	21
1207	1	1004	48	67.5	147.5	60	12	11	25	85	6245	20	59
1208	1	1004	48	67.5	147.5	60	13	8	29	85	6212.5	19	59
1209	0	1005	48	47.5	105	60	5	11	34	74	4610	14	70
1210	0	1005	48	45	97.5	60	7	9	17	70	3411.64	12	74
1211	1	1006	7	57.5	147.5		22		3	41	6000	27	103
1212	1	1006	35	32.5	90	50	34	7	0	58	3547.5	15	86
1213	1	1006	35	42.5	110	50	34	7	1	82	5880	15	62
1214	1	1006	35	40	97.5	50	36	5	1	71	4205	13	73
1215	1	1006	35	40	97.5	50	36	5	2	99	6210	13	45
1216	1	1006	35	50	122.5	50	34	7	0	69	5747.5	15	75
1217	1	1006	35	47.5	122.5	50	31	6	1	97	4637.5	18	47
1218	1	1006	17	41.25	105		7		13	31	3245	8	113
1219	1	1006	7	40	97.5		11		22	48	4672.5	8	96
1220	1	1006	17	41.25	105		7		25	61	6370	8	83
1221	1	1006	17	33.75	97.5		32		21	72	7032.5	9	72
1222	1	1009	56	27.5	65	50	14	10	15.1648	138	5371.95	31	6
1223	1	1009	56	32.5	72.5	50	15	9	7.36264	134	5643.71	30	10
1224	1	1009	1	52.5	110	50	32	9	0	61	3304.68	13	83
1225	1	1009	9	65	135	50	32	4	56	119	8330	22	25
1226	0	1011	96	64.375	162.5	50	12	7	37	127	10407.5	12	17
1227	0	1011	30	71.3	172.5	50	13	6	30	79	8237.5	11	65
1228	0	1011	96	64	160	50	15	6	29	63	5910	9	81
1229	0	1011	65	48	120	60	17	4	38	92	5226.67	7	52
1230	0	1011	96	40	100	60	34	10	27	108	4526.67	15	36
1231	0	1011	96	67.5	170		7		12	26	4410	8	118
1232	0	1011	96	37.5	95		7		15	32	3045	8	112
1233	0	1011	24	69.7	170		41		28	61	10317.5	8	83
1234	0	1011	24	90.2	220		41		21	57	12462.5	8	87
1235	0	1011	24	56	160		29		7	23	3691.25	8	121
1236	0	1011	24	71.4	170		7		31	92	15687.5	8	52
1237	1	1006	17	45	145	50	37	4	0	65	3747.5	12	80
1238	0	1011	63	52.5	110	50	32	6	37	80	4412.5	9	65
1239	1	1006	10	30	90		20		6	66	5904	29	80
1240	1	1006	10	35	95	50	25	7	12.5714	143	6864	24	3
1241	0	1004	3	40	105	60	16	11	23	85	4040	16	62
1242	1	1006	7	42.5	110		10		13	35	3872.5	9	112
1243	1	1009	56	45	98.75	50	20	8	28.0879	142	6816	34	5
1244	0	1011	24	32.125	90	50	19	6	45	118	4961.67	9	29
1245	0	1011	65	78	195	60	16	5	36	94	8766.67	8	53
1246	1	1001	38	88.875	197.5		12		1	54	10630	20	94
1247	1	1001	38	43.875	97.5	50	23	9	19.3846	147	7056	31	1
1248	1	1001	38	100.125	222.5	50	24	6	9.69231	47	7056	30	101
1249	1	1005	61	63.425	147.5	60	6	21	58.6154	87	6096	26	61
1250	1	1001	31	75.375	172.5		15		0	47	8180	17	102
1251	1	1006	7	47.5	122.5	50	29	7	42	141	8500	20	8
1252	1	1006	7	87.5	222.5	50	28	8	24	120	13247.5	21	29
1253	1	1009	9	45	95	50	19	5	5.09341	103	4944	26	46
1254	1	1009	1	32.5	70	50	32	9	24	80	3567.2	13	69
1255	0	1011	38	30	100	50	19	6	31	91	5290	9	58
1256	0	1011	96	39	97.5	50	19	6	43	94	5610	9	55
1257	0	1004	3	35	95	60	16	11	1	87	3215.03	16	63
1258	0	1011	24	71.95	195		29		12	39	7525	8	111
1259	0	1011	81	43.5	115		2		13	37	4292.5	8	113
1260	1	1011	85	65.625	160		16		25	66	10590	8	84
1261	0	1011	96	45	95		2		13	27	2552.5	8	123
1262	0	1011	24	46.2	110		6		29	63	6875	9	87
1263	1	1006	7	40	97.5	50	15	9	45.2308	147	7056	34	5
1264	1	1006	17	59.375	170		11		9	22	3692.5	8	130
1265	0	1011	96	55	137.5		7		29	84	11495	8	68
1266	1	1006	10	30	90	50	24	8	20	130	6240	25	23
1267	0	1011	63	58.75	122.5		41		18	60	7392.5	8	93
1268	0	1005	48	60.75	147.5	50	6	7	15	81	6825.12	13	73
1269	1	1006	17	54.375	145	50	11	13	61.7692	126	7008	38	28
1270	1	1006	7	45	110	50	22	10	42.1538	137	6576	27	17
1271	0	1006	17	40	97.5		10		18	51	4937.5	9	103
1272	1	1009	56	34.7	98.75	50	21	7	19.6484	149	7152	33	5
1273	1	1001	31	40	85	50	28	13	53.3077	154	7392	26	1
1274	1	1002	64	29.9	80	50	2	9	28.0879	142	6218.41	30	13
1275	1	1002	27	37.5	85	50	2	9	24.0308	142	6816	30	13
1276	0	1003	97	23.125	70		6		46	113	7890	22	42
1277	1	1006	7	45	110	50	18	7	28.2462	153	7344	31	2
1278	1	1009	56	34	80	50	19	13	16.8923	122	5856	26	33
1279	0	1011	30	66.25	147.5	50	15	4	53	108	7337.5	9	47
1280	0	1011	81	123.9	297.5		28		34	75	22320	9	80
1281	1	1001	31	120	245		7		4	54	13344	25	102
1282	1	1001	38	43.875	97.5	50	6	10	57	141	6738.33	13	15
1283	1	1002	27	26.25	85	60	2	9	8.07692	147	5258.45	30	9
1284	0	1003	97	23.125	70		6		12	80	5603.33	22	76
1285	0	1004	89	60.9	145	50	16	9	29	143	8847.5	16	13
1286	1	1006	17	40	105	50	20	5	9.62637	146	7008	29	10
1287	1	1006	17	37.5	97.5	50	20	8	25.9121	131	6288	29	25
1288	1	1006	35	57.5	147.5	50	25	7	17.8901	118	7104	24	38
1289	1	1006	17	38.75	97.5		11		25	61	5942.5	8	95
1290	1	1009	56	45	98.75	50	20	8	23.3538	138	6624	25	18
1291	1	1009	82	37.5	105		19		12	40	4160	9	116
1292	0	1011	83	85	205	50	34	11	2	110	9693.33	15	46
1293	0	1011	65	34	85	50	19	6	54	129	4930	9	27
1294	0	1011	30	47.5	105	50	16	5	42	92	4811.67	8	64
1295	0	1011	83	70	170	60	35	10	24	101	7600	14	55
1296	0	1011	96	42.5	105		8		4	94	9820	7	62
1297	0	1011	96	75	180		8		40	96	17217.5	7	60
1298	0	1011	11	134.4	320		37		15	39	12372.5	8	117
1299	1	1011	85	47.5	122.5		29		34	82	10027.5	8	74
1300	1	1011	85	47.5	122.5		29		33	86	10595	8	70
1301	0	1011	81	40.75	110		28		13	29	3200	9	127
1302	1	1011	85	67.1	172.5		28		17	41	7077.5	9	115
1303	1	1006	35	57.5	147.5	50	30	7	0	95	5592.5	19	62
1304	1	1006	17	38.75	97.5	50	19	6	18.4154	133	6384	30	24
1305	1	1006	7	50	122.5	50	18	7	33.6264	143	7344	31	14
1306	1	1006	7	37.5	97.5		10		26	59	5752.5	9	98
1307	1	1001	31	71.25	147.5		7		6	102	14976	25	56
1308	1	1004	10	72.5	170	50	32	9	1	105	8270	22	53
1309	1	1006	7	40	97.5	50	19	9	17.1077	139	6672	30	19
1310	1	1006	10	27.5	85		6		21	117	9982.5	18	41
1311	1	1009	9	45	105	50	6	18	15.3846	140	6720	39	18
1312	1	1009	82	17.8	48.75	50	19	9	26	97	2782.26	13	61
1313	0	1011	65	98	245		29		42	91	22212.5	8	67
1314	0	1011	96	72	180	50	20	5	14	41	4826.25	8	118
1315	0	1003	90	26.25	80		17		2	143	11470	20	17
1316	0	1003	47	31.25	80	50	30	7	37.2308	154	7392	24	7
1317	1	1004	89	54.6	130	60	13	14	2	84	4983.33	19	77
1318	1	1006	10	27.5	90	50	20	8	45.2308	147	7056	29	14
1319	0	1011	24	75.85	185		41		22	66	12297.5	8	95
1320	1	1001	38	77.625	172.5		12		1	51	8852	20	111
1321	1	1001	31	83.75	172.5		35		40	78	13450	19	84
1322	1	1001	31	83.75	172.5	50	35	6	40	120	10598.3	14	42
1323	1	1006	7	62.5	160		10		7	47	7440	39	115
1324	1	1006	17	51.25	122.5	50	28	8	32	136	7171.67	21	26
1325	1	1009	82	37.5	105	50	19	9	5.49451	125	6000	26	37
1326	1	1009	78	32.1	80	60	18	9	22	107	3495	14	55
1327	0	1011	30	47.5	105	50	16	5	43	94	5727.5	8	68
1328	0	1011	63	58.75	122.5	60	45	5	68	49	5933.33	9	113
1329	1	1011	85	86.7	222.5		29		8	19	4212.5	8	143
1330	0	1011	24	35.7	85		2		11	35	2990	8	127
1331	1	1011	85	70.625	172.5		33		12	39	6807.5	8	123
1332	1	1011	85	70.625	172.5		33		10	27	4648.75	8	135
1333	1	1011	85	67.1	172.5		29		14	47	8032.5	8	115
1334	1	1011	85	67.1	172.5		29		27	61	10440	8	101
1335	1	1006	17	37.5	97.5		20		7	70	6816	29	93
1336	1	1006	10	30	85	50	22	10	24.7692	161	7728	27	2
1337	1	1009	82	46	105		19		9	71	7440	35	92
1338	0	1006	90	46.875	120	50	20	12	58.8462	153	7344	29	11
1339	1	1011	85	40	97.5	60	5	14	75	148	7870	19	16
1340	1	1009	78	21.4	60	50	18	7	0	144	3552.5	14	21
1341	1	1001	31	108.75	222.5		30		6	31	6816	24	135
1342	1	1001	38	77.625	172.5	50	17	11	2	104	8445	15	62
1343	1	1001	31	71.25	147.5	50	24	4	25	56	4452.5	8	110
1344	0	1004	82	41.875	120	60	16	14	49	107	7213.33	16	59
1345	1	1009	78	23.55	60	50	18	7	9.82418	149	6164.57	27	17
1346	1	1011	85	100	245	60	6	13	69	137	17763.3	18	29
1347	0	1004	82	51.25	145	60	21	9	30	72	5548.33	11	95
1348	0	1006	17	33.75	85		2		10	27	2283.75	8	140
1349	0	1011	63	58.75	122.5	50	32	6	28	83	5215	9	84
1350	0	1011	38	63.75	185	50	13	6	27	66	7836.88	11	101
1351	0	1011	65	68	170		29		5	38	6542.5	8	129
1352	1	1001	31	132.5	270	50	30	7	14.3297	53	7824	24	115
1353	1	1001	38	88.875	197.5	50	2	7	33	128	11975	17	40
1354	1	1001	38	77.625	172.5		6		37	67	11608.3	13	101
1355	1	1002	56	25	95	60	11	8	25	154	4486.67	21	14
1356	0	1004	82	51.25	145	60	17	10	1	77	4352.5	15	91
1357	0	1006	90	21.875	85		25		6	94	8016	29	74
1358	1	1006	35	57.5	147.5		37		11	23	3378.75	8	145
1359	1	1006	7	67.5	172.5		10		15	37	6380	9	131
1360	1	1009	78	35.625	85	50	32	4	68	167	6185	22	1
1361	1	1009	82	60	165	60	35	13	84	166	14976.7	19	2
1362	1	1009	9	33.75	80		6		17	50	4002.5	9	118
1363	0	1011	63	44.075	122.5		33		1	87	10624	16	81
1364	0	1011	50	82.5	197.5	50	35	10	33	138	16580	14	30
1365	0	1011	24	50.375	170	50	36	8	22	153	10348.3	13	15
1366	0	1011	96	54	135	50	16	5	20	47	3667.5	8	121
1367	0	1011	4	28.5	71.25	50	34	7	1	121	3511.67	15	47
1368	0	1011	63	27.5	60		41		17	50	3017.5	8	118
1369	0	1011	65	68	170		29		24	52	8920	8	116
1370	1	1011	85	142.5	347.5		33		10	19	6472.5	8	149
1371	1	1011	85	75.625	185		6		8	25	4582.5	9	143
1372	1	1001	31	58.75	122.5	50	24	4	33	80	5402.5	8	90
1373	1	1006	17	66.25	170	50	21	4	0	67	10210	16	103
1374	1	1006	17	37.5	97.5	50	31	5	2	97	3922.5	18	73
1375	0	1005	7	60.375	172.5	60	5	11	3	127	8937.4	14	45
1376	1	1006	7	40	97.5	50	23	9	19.0769	155	7440	26	17
1377	1	1009	9	22.5	50		28		32	164	8208	26	8
1378	0	1011	38	16.5	65	50	16	5	57	126	3521.67	8	46
1379	1	1009	56	50.625	110	50	15	13	29.0769	137	7056	30	36
1380	1	1009	9	52.5	110	60	19	11	39.6484	144	7872	26	29
1381	0	1011	24	62.725	170		29		15	49	8297.5	8	124
1382	1	1001	31	96.25	197.5	50	6	7	8.35714	69	8112	26	105
1383	1	1001	38	66.375	147.5		6		57	114	16851.9	13	60
1384	0	1003	2	32.5	95		16		0	38	3633.33	12	136
1385	1	1006	17	37.5	97.5	50	21	7	27.956	159	7632	28	15
1386	1	1006	35	52.5	122.5	50	31	6	1	67	5360	18	107
1387	1	1006	35	40	97.5	50	29	8	29	133	6180	20	41
1388	1	1006	7	42.5	110		6		10	24	2620	9	150
1389	1	1009	9	25.2	85		14		15	98	8304	40	76
1390	1	1009	56	30	70	50	14	10	28.8	156	7336.32	31	18
1391	1	1009	82	55	115		29		14	131	15072	25	43
1392	0	1011	24	60.9	145	50	13	8	17	55	4377.5	11	119
1393	0	1011	30	46	110		7		16	55	6085	8	119
1394	0	1011	38	30	90		6		13	45	4047.5	9	129
1395	1	1001	31	96.25	197.5		4		13	37	7296	28	138
1396	1	1006	7	38.75	97.5		2		26	58	5680	8	117
1397	1	1006	17	45	145		28		9	27	3882.5	9	148
1398	1	1011	85	45	110	50	7	12	41	154	7268.33	17	21
1399	1	1006	35	42.5	110	50	25	7	13.7143	156	7488	24	20
1400	1	1006	7	37.5	97.5	50	28	8	39	161	6680	21	15
1401	1	1011	85	52.25	135	50	9	12	82	134	9971.67	15	42
1402	1	1011	85	100	245		6		17	42	10407.5	9	134
1403	0	1006	90	32.5	90		11		11	36	3255	8	141
1404	1	1001	38	66.375	147.5	50	3	6	25	130	9095	16	48
1405	1	1006	7	42.5	110	50	19	9	31.7538	172	8256	30	6
1406	1	1006	7	37.5	97.5		10		12	30	2905	9	148
1407	1	1009	78	23.55	60	50	18	7	1	100	2585	14	78
1408	1	1009	9	22.5	50		28		30	170	8496	26	8
1409	1	1006	7	45	110		29		1	68	7455	20	111
1410	1	1006	10	40	110		2		15	50	5535	8	129
1411	0	1006	90	38.75	110		7		11	27	2921.25	8	152
1412	0	1006	90	23.75	85		2		12	30	2591.25	8	149
1413	1	1009	78	62.5	130	50	32	9	34	114	9020	13	65
1414	0	1011	96	35	87.5	50	7	12	47	159	8665	17	20
1415	0	1011	96	80	195		2		32	105	20560	8	74
1416	0	1011	24	81.9	195		7		49	119	23165	8	60
1417	0	1003	92	16.875	70	50	27	14	3	179	4250	22	1
1418	0	1003	92	16.875	70	50	27	14	34	170	4545	22	10
1419	0	1003	90	26.25	80	60	17	8	24	57	2862.5	11	123
1420	0	1004	33	59.375	147.5	60	17	10	49	65	8790	15	115
1421	0	1004	89	46.2	110	60	16	11	36	66	6290	16	114
1422	0	1004	89	60.9	145	60	22	8	29	64	5187.5	10	116
1423	1	1006	10	36.25	105	50	24	8	7.86264	159	7632	25	21
1424	1	1006	7	45	110	50	37	7	35	129	6625	12	51
1425	1	1009	82	37.5	105		18		10	75	7824	27	105
1426	1	1009	78	55.2	125		36		22	64	8002.5	9	116
1427	0	1011	30	40.25	97.5	50	17	4	28	92	5575	7	88
1428	0	1011	0	59	147.5	50	37	7	2	95	6657.5	12	85
1429	0	1011	4	38.5	96.25	50	34	7	3	72	5600	15	108
1430	0	1011	24	60.9	145		2		21	50	7220	8	130
1431	0	1011	30	60.95	147.5		2		14	47	6877.5	8	133
1432	0	1011	83	87.5	210		29		26	67	14155	8	113
1433	0	1011	83	72.5	170		29		28	83	14107.5	8	97
1434	0	1011	63	118.125	395		40		20	68	26867.5	9	112
1435	0	1011	38	50.625	147.5		6		14	32	4765	9	148
1436	1	1004	89	46.2	110		32		1	42	4644	22	139
1437	1	1006	35	47.5	122.5		25		3	56	6816	24	125
1438	1	1006	10	30	90	60	24	8	28.8	156	6927.38	25	25
1439	1	1001	31	46.25	97.5	50	2	14	55.7308	161	7728	30	21
1440	1	1006	7	40	97.5	50	22	10	56.0769	162	7776	27	20
1441	1	1001	31	120	245	50	9	14	8.50549	29	6192	23	154
1442	1	1001	31	46.25	97.5	50	6	10	33.4286	169	8112	26	14
1443	1	1009	78	27.825	70	50	17	8	35	145	6192.5	15	38
1444	1	1009	9	47.5	98.75		28		29	167	16512	26	16
1445	0	1011	96	75	195		7		13	33	6486.25	8	150
1446	0	1011	96	55	137.5		7		30	79	10855	8	104
1447	1	1006	7	71.875	197.5		26		4	79	15648	23	105
1448	1	1006	7	42.5	110		10		10	31	3445	9	153
1449	1	1001	31	46.25	97.5	50	3	13	29.1077	172	8256	29	13
1450	1	1006	14	60	170	50	17	7	33.9692	84	8832	37	101
1451	1	1005	89	46.2	110	50	2	21	15.7253	159	7632	30	27
1452	1	1006	35	40	97.5		34		1	64	6262.5	15	122
1453	1	1006	7	57.5	147.5	50	10	14	21.1692	72	8256	39	114
1454	1	1006	17	36.25	97.5	50	37	7	39	146	7077.5	12	40
1455	1	1006	7	45	110		10		20	68	7455	9	118
1456	0	1011	96	40	95		13		11	36	3440	11	150
1457	0	1011	96	35	87.5	50	20	5	34	82	4225	8	104
1458	0	1011	63	77.5	195		41		12	32	6155	8	154
1459	0	1011	24	36.9	100		29		10	30	2981.25	8	156
1460	0	1011	96	59	147.5		2		20	58	8580	8	128
1461	0	1011	38	65.625	185		6		11	29	5421.25	9	157
1462	1	1001	31	108.75	222.5		13		1	75	16636	19	112
1463	1	1001	31	108.75	222.5	50	15	13	15	92	10915.7	17	95
1464	1	1001	31	58.75	122.5	50	24	4	41	120	7842.5	8	67
1465	0	1003	92	16.875	70	50	26	15	22.7692	185	6704.71	28	2
1466	1	1009	78	27.825	70	50	18	7	9.89011	180	8640	36	7
1467	0	1003	40	30.625	95		6		36	90	8511.67	13	98
1468	1	1001	31	40	85	50	19	9	2	89	3697.33	13	100
1469	0	1003	18	27.5	95	50	28	5	56.9231	185	8880	26	4
1470	1	1006	7	29.375	74.95	50	8	20	25.6154	185	8880	41	4
1471	1	1006	17	32.5	97.5	60	20	5	31.6484	180	8640	29	9
1472	1	1006	17	38.75	97.5		10		43	103	10062.5	9	87
1473	1	1001	38	66.375	147.5		10		32	145	21452.5	22	46
1474	1	1001	38	60.75	135	50	3	6	1	77	8240	16	114
1475	1	1004	48	77.5	172.5	50	32	9	3	144	11890	17	47
1476	1	1005	53	50	112.5	50	2	4	21	55	3903.08	8	136
1477	1	1006	7	42.5	110	50	23	7	10.1538	168	8064	26	23
1478	1	1009	9	34.65	115	60	16	16	75.7308	179	8592	29	12
1479	0	1011	38	22.5	70	50	11	8	83	181	5998.33	13	10
1480	1	1002	27	25	85	60	2	9	37.7802	191	8067.12	30	1
1481	1	1005	33	59.375	147.5	60	7	9	17.3077	75	8400	25	117
1482	1	1006	7	90	222.5	50	33	8	1	114	12755	16	78
1483	1	1006	17	38.75	97.5		11		14	33	3231.25	8	159
1484	1	1009	9	36	85	50	19	5	7.46703	151	7248	26	41
1485	0	1011	81	27.125	72.5	50	5	14	44	163	6590	19	29
1486	0	1011	24	40.375	105	50	12	7	36	162	8332.5	12	30
1487	0	1011	96	32	80	50	16	5	27	80	3975	8	112
1488	0	1011	50	79.7	222.5		37		37	82	18190	8	110
1489	1	1011	85	77.1	197.5		29		18	53	10487.5	8	139
1490	0	1011	96	55	137.5		7		12	36	4948.75	8	156
1491	0	1011	96	55	137.5		7		20	68	9337.5	8	124
1492	0	1011	96	37.5	95		7		34	90	8532.5	8	102
1493	0	1011	96	70	175		2		56	146	25570	8	46
1494	0	1011	24	46.2	110		6		12	36	3942.5	9	156
1495	1	1001	31	71.25	147.5		36		22	148	21826.7	18	45
1496	1	1001	31	108.75	222.5	50	32	9	92	82	17945	22	111
1497	1	1009	82	60	165	50	32	16	78	192	16903.3	22	1
1498	1	1001	31	46.25	97.5	50	21	15	50.9011	193	9264	33	1
1499	1	1006	7	42.5	110	50	22	10	47.7363	181	8688	27	13
1500	1	1006	17	40	105	50	20	8	29.1868	166	7968	29	28
1501	1	1006	17	40	105		45		4	28	2920	9	166
1502	1	1009	78	29.925	75	50	18	14	36.7473	152	6823.21	27	42
1503	1	1006	10	36.25	110	50	28	13	81	159	9275	21	36
1504	1	1006	7	50	122.5	60	15	9	67.5	95	9360	34	101
1505	1	1009	78	47.075	115	60	17	10	71.9231	170	8160	28	26
1506	1	1001	31	46.25	97.5	50	6	10	54.7692	178	8544	26	19
1507	0	1011	24	51	135	50	11	8	1	138	11785	13	59
1508	1	1001	31	83.75	172.5	50	40	8	77	89	14990	14	109
1509	1	1006	35	45	122.5	50	34	7	0	84	6432.5	15	114
1510	1	1006	7	45	110		7		16	36	3905	8	162
1511	1	1009	9	47.5	98.75		28		14	143	14112	26	55
1512	0	1011	30	33.35	80	50	17	4	40	133	6572.5	7	65
1513	0	1011	65	54	135	50	34	10	26	129	8840	15	69
1514	1	1001	31	96.25	197.5	50	24	12	10.7143	95	9360	30	104
1515	1	1001	31	83.75	172.5	50	29	8	21.7582	98	9504	25	101
1516	1	1001	31	75.375	172.5		7		13	43	7335	8	156
1517	0	1004	61	95.675	222.5		33		5	17	3767.5	8	182
1518	1	1011	85	71.85	185		29		14	34	6340	8	165
1519	1	1001	38	77.625	172.5		11		17	83	14395	21	117
1520	1	1006	14	36.25	97.5	50	12	12	27.5538	199	9552	42	1
1521	0	1003	61	22.5	80	60	3	13	67.8462	196	9408	25	5
1522	1	1006	7	57.5	147.5	50	34	7	29	133	11007.5	15	68
1523	1	1009	9	56	145	50	37	4	57	167	12012.5	8	34
1524	1	1001	38	43.875	97.5	50	6	10	90	177	9063.33	13	25
1525	1	1001	31	58.75	122.5		15		44	96	11735	9	107
1526	1	1004	91	49	122.5	60	14	13	25	142	7206.67	18	61
1527	1	1006	10	30	85	50	29	8	2	182	7116.67	20	21
1528	1	1006	7	40	97.5	50	33	8	1	71	6015	16	132
1529	1	1006	7	62.5	160	50	24	8	44.8352	70	8160	25	133
1530	1	1006	7	42.5	110		7		21	56	6135	8	147
1531	1	1009	78	41.4	100		32		1	105	10546	22	98
1532	0	1011	96	72	180	50	19	6	24	52	5162.5	9	151
1533	1	1001	38	49.5	110	50	7	9	40	86	9180	12	118
1534	1	1001	31	58.75	122.5		23		27	79	9705	9	125
1535	0	1002	54	40	110	50	34	11	1	126	6733.54	15	78
1536	1	1004	91	49	122.5	50	14	11	26	157	10937.5	18	47
1537	0	1004	33	74.375	197.5		24		30	66	13095	8	138
1538	0	1005	91	59	147.5	60	7	9	0	46	3132.19	12	158
1539	0	1005	91	59	147.5	60	9	7	37	99	7220	10	105
1540	0	1005	91	59	147.5	60	8	8	28	94	5647.5	11	110
1541	1	1006	14	46.875	135		17		4	71	9552	37	133
1542	0	1006	17	37.5	97.5	50	37	4	1	151	5687.5	17	53
1543	0	1011	96	42.525	105	50	12	7	3	86	7218.33	12	118
1544	0	1011	65	42	105	50	16	5	23	68	4065	8	136
1545	0	1011	24	35.7	85	50	14	7	62	81	5953.33	10	123
1546	0	1011	96	78	195	50	34	7	26	75	7577.5	11	129
1547	1	1011	85	57	147.5	50	9	12	32	149	10631.7	15	55
1548	1	1011	85	47.5	122.5		29		10	28	3477.5	8	176
1549	1	1011	85	86.7	222.5		29		12	33	7262.5	8	171
1550	0	1011	30	35	110		2		18	61	6672.5	8	143
1551	0	1011	24	77	220		29		25	55	12055	8	149
1552	0	1011	30	71.3	172.5		7		15	39	6756.25	8	165
1553	1	1006	7	57.5	147.5	50	18	7	12.2088	102	9696	23	103
1554	0	1006	17	37.5	97.5	50	29	8	31.2308	203	9744	25	3
1555	1	1001	38	88.875	197.5	50	19	9	103	85	16023.3	13	122
1556	1	1001	38	88.875	197.5		35		3	155	30700	19	53
1557	1	1001	38	77.625	172.5		13		3	142	24455	19	66
1558	1	1001	31	58.75	122.5		40		117	98	12025	14	110
1559	1	1006	14	44.375	120	50	17	7	24.7802	205	9840	37	3
1560	1	1006	10	30	85	60	22	8	45.2747	206	8940.49	27	2
1561	1	1001	31	40	85	50	15	13	2	122	5110	17	87
1562	1	1004	48	77.5	172.5	50	32	9	32	76	12866.7	17	133
1563	1	1006	7	57.5	147.5	50	33	8	2	106	6927.5	16	103
1564	0	1011	65	54	135	50	11	8	23	156	11517.5	13	53
1565	0	1011	38	25.5	90	50	20	5	58	172	6026.67	8	37
1566	0	1011	63	83.75	172.5		41		24	64	11102.5	8	145
1567	1	1001	31	46.25	97.5	50	23	13	20.4725	207	9936	31	3
1568	1	1001	31	40	85	50	3	13	15.7363	179	8592	29	31
1569	1	1001	31	46.25	97.5	50	25	11	96	208	9984	29	2
1570	1	1004	89	71.4	170		12		1	44	7547.5	20	166
1571	0	1004	89	60.9	145	50	16	9	2	68	9480	16	142
1572	0	1004	89	60.9	145	60	16	11	51	74	9435	16	136
1573	1	1006	10	32.5	90	50	14	10	72.3077	188	9024	35	22
1574	1	1006	17	38.75	97.5	60	17	7	11.6044	192	7611.51	32	18
1575	1	1006	17	37.5	97.5		11		25	66	6437.5	8	144
1576	1	1006	7	42.5	110		10		39	87	9587.5	9	123
1577	0	1011	63	58.75	122.5		41		14	16	1901.25	8	194
1578	0	1011	63	27.5	60		40		21	54	3260	9	156
1579	1	1011	85	57	147.5		28		13	32	4667.5	9	178
1580	1	1001	38	132.75	295		37		26	93	27578.3	17	118
1581	1	1006	14	57.5	170	50	17	11	10.3352	109	10032	37	102
1582	1	1009	53	55	122.5	60	19	5	27.5846	133	7824	30	78
1583	1	1009	78	29.95	75	60	17	10	18.2418	166	5586.25	28	45
1584	0	1011	30	38.75	85	50	16	5	60	133	6895	8	78
1585	1	1011	85	80.625	197.5		6		17	41	8112.5	9	171
1586	1	1001	31	71.25	147.5		15		2	68	9964	17	145
1587	1	1006	7	40	97.5	50	22	10	40.6593	185	8880	27	28
1588	1	1006	7	37.5	97.5	50	18	10	34.1099	194	9312	31	19
1589	1	1009	78	29.925	75	60	18	9	21.7582	180	6315.33	27	33
1590	1	1001	31	96.25	197.5	50	8	8	46.6813	77	8496	24	137
1591	1	1006	14	41.875	120	50	12	12	55.9121	212	10176	42	2
1592	1	1011	85	63.525	160	50	15	4	51	151	11687.5	9	63
1593	0	1011	24	60.9	145	50	13	8	38	100	9634.82	11	114
1594	0	1011	50	46.125	122.5	60	33	12	33	79	8010	16	135
1595	1	1001	31	71.25	147.5	50	3	8	18.989	92	9216	29	123
1596	0	1003	18	18.75	60	50	32	5	0	105	2562.5	17	110
1597	0	1003	2	30	95	50	24	9	10.7692	196	9408	25	19
1598	0	1003	97	23.125	70		6		32	134	9403.33	18	81
1599	1	1006	10	37.5	110	50	22	10	26.3077	190	9120	27	25
1600	0	1011	38	45	162.5	50	19	6	34	81	8773.78	9	134
1601	0	1011	38	57	200	50	16	5	45	108	13055	8	107
1602	0	1011	81	27.125	72.5	60	19	6	136	159	6051.67	9	56
1603	1	1001	31	46.25	97.5	50	21	15	65.5385	213	10224	33	3
1604	1	1004	48	77.5	172.5	50	32	9	58	115	15627.5	22	101
1605	1	1006	10	37.5	110		7		30	66	7217.5	8	150
1606	1	1009	78	40.375	90	50	32	9	0	117	5017.55	13	99
1607	0	1011	24	75.85	185		41		28	73	13520	8	143
1608	0	1011	63	52.5	110		40		26	70	7677.5	9	146
1609	0	1011	63	27.5	60		40		22	73	4372.5	9	143
1610	0	1011	63	46.25	97.5		40		18	25	2448.75	9	191
1611	0	1011	24	41	100		40		25	83	8272.5	9	133
1612	0	1011	63	46.25	97.5		40		28	93	9065	9	123
1613	0	1011	63	58.75	122.5		40		22	74	9022.5	9	142
1614	1	1006	14	55	170	50	12	12	14.5934	66	7968	37	151
1615	0	1002	64	26.5	85		24		18	54	4570	8	164
1616	1	1006	14	37.5	110	50	12	12	10	182	8736	37	37
1617	1	1011	85	40	97.5	50	5	14	27	185	8923.33	19	34
1618	1	1011	85	45	110	50	6	13	37	184	9975	18	35
1619	1	1001	31	108.75	222.5		16		3	136	30149	16	84
1620	0	1003	2	30	95	60	24	9	35.5385	210	9255.27	25	10
1621	1	1009	9	31.5	95	60	21	11	87.2308	189	9072	24	31
1622	1	1011	85	67.1	172.5		29		41	90	15587.5	8	130
1623	1	1009	0	55	122.5	50	32	4	2	120	8680	22	101
1624	0	1011	63	27.5	60		33		1	72	4302	16	149
1625	1	1001	38	88.875	197.5	50	23	7	14.5714	111	10608	31	111
1626	1	1001	31	83.75	172.5		15		1	64	11096	17	158
1627	0	1004	61	84.925	197.5		32		7	17	3382.5	9	205
1628	1	1006	10	36.25	85	50	29	12	115	207	9228.33	20	15
1629	1	1006	17	36.25	97.5	50	35	6	1	76	6233.33	14	146
1630	1	1006	17	57.5	147.5	50	23	9	36.7231	117	10416	26	105
1631	1	1006	7	42.5	110		7		14	29	3140	8	193
1632	0	1011	81	21.7	72.5	50	12	7	35	176	5606.67	12	46
1633	0	1011	65	69	172.5		37		31	74	12735	8	148
1634	1	1006	17	33.75	97.5	50	19	6	34.8132	132	6336	30	91
1635	1	1009	82	36.8	85	50	8	16	31.8154	188	9024	37	35
1636	1	1001	31	71.25	147.5		22		7	72	10656	32	152
1637	1	1006	10	31.25	90	50	28	13	47	197	7626.67	21	27
1638	1	1009	82	21.85	61.25	50	32	4	42	198	5122.5	17	26
1639	1	1004	89	65.1	155	50	32	9	49	123	12273.3	22	102
1640	1	1006	14	55	170		12		6	47	8064	37	178
1641	1	1009	9	36	85		12		1	125	10602	20	100
1642	1	1009	78	27.825	70	50	18	7	19.8901	181	7889.68	27	44
1643	0	1003	18	18.75	60	50	32	5	1	115	3005	17	111
1644	1	1009	78	41.4	100		24		15	51	5070	8	175
1645	1	1006	14	55	145		7		26	69	10065	8	158
1646	1	1009	78	30.875	70	50	26	7	2	129	4202.5	19	98
1647	1	1001	31	71.25	147.5	50	3	13	32	82	8736	29	146
1648	0	1002	99	52.5	120	50	34	11	100	164	11300	15	64
1649	1	1006	14	60	170		7		10	114	19296	42	114
1650	1	1006	17	46.25	120		29		32	77	9205	8	151
1651	1	1006	7	37.5	97.5		10		16	42	4130	9	186
1652	0	1011	96	35	87.5	50	8	11	3	189	6960	16	39
1653	0	1011	24	62.725	170		29		26	62	10485	8	166
1654	0	1011	65	69	172.5		2		7	42	7300	8	186
1655	1	1001	31	83.75	172.5	60	6	10	60.3077	96	9408	26	133
1656	1	1009	78	34.2	85	60	19	8	38.6813	176	7733.96	26	53
1657	0	1011	30	66.25	147.5	50	16	5	74	95	12441.7	8	134
1658	1	1001	31	75.375	172.5		15		0	66	11382	17	164
1659	1	1004	89	71.4	170		12		1	50	8572.5	20	180
1660	1	1006	14	39.375	110		17		4	99	10848	37	131
1661	1	1006	14	50	145	50	29	12	31.4308	127	10896	25	103
1662	1	1001	31	65	135		3		18	71	9552	29	160
1663	1	1001	38	38.25	85	50	17	11	98	114	7928.33	15	117
1664	1	1006	14	37.5	110		29		5	96	10560	25	135
1665	0	1011	65	79	197.5		7		23	61	12035	8	170
1666	1	1006	7	40	97.5	50	22	6	27.2967	207	9936	27	25
1667	1	1006	7	42.5	110		7		19	41	4462.5	8	191
1668	1	1009	82	21.85	48.75	50	20	8	2	115	2757.76	12	117
1669	1	1009	82	43.7	98.75	50	32	9	25	135	7570	13	97
1670	1	1011	85	70.625	172.5		32		21	68	11647.5	9	164
1671	1	1001	38	27	60		13		51	191	11441	19	42
1672	1	1006	10	30	90	60	24	8	47.4725	216	9346.92	25	17
1673	0	1011	30	66.25	147.5	50	13	6	57	188	13120	11	45
1674	1	1011	85	40.5	110		19		17	56	6115	9	177
1675	1	1001	31	108.75	222.5		41		17	45	10086.2	8	189
1676	0	1003	56	28.75	80		16		1	36	2898.67	12	198
1677	1	1006	14	60	170	50	2	22	90	134	11232	46	100
1678	1	1006	17	41.25	110	50	35	6	20	52	3172.5	10	182
1679	1	1009	78	21.4	55	50	17	11	21.2747	176	5256.88	28	58
1680	1	1009	9	33.25	98.75	60	15	17	95.5385	207	9936	30	27
1681	0	1011	81	24.5	65		6		16	46	2958.75	9	188
1682	1	1006	17	49.375	122.5		20		9	70	8592	29	165
1683	1	1006	10	47.5	140	50	11	13	68.3077	222	10656	38	13
1684	1	1006	17	41.25	110	50	37	4	2	79	6527.5	12	156
1685	1	1006	7	37.5	97.5	50	22	6	11.3736	230	11040	27	6
1686	1	1006	17	67.5	170	50	25	7	23.1429	134	11232	24	102
1687	1	1009	9	18.9	65	50	15	8	1	108	4045	13	128
1688	1	1009	9	28.35	95	50	15	17	70.2692	203	9744	30	33
1689	1	1001	38	77.625	172.5		24		8	65	11136	25	172
1690	0	1003	2	32.5	95		16		25	136	12913.3	12	101
1691	1	1006	10	30	90	50	14	10	93.5	221	10608	35	16
1692	1	1009	82	37.5	110		19		9	101	11088	35	136
1693	1	1009	82	27.6	65	50	32	9	1	124	3960.94	13	113
1694	1	1009	78	47.5	100		24		36	79	7862.5	8	158
1695	1	1002	64	25.825	85		7		12	118	10032	25	120
1696	0	1003	9	23.125	80	60	2	9	28.8	234	8719.6	26	4
1697	0	1004	61	84.925	197.5	50	32	9	71	174	19452.5	13	64
1698	1	1005	89	46.2	110	60	7	20	64.3077	209	10032	25	29
1699	1	1001	31	71.25	147.5		15		1	73	10768	17	166
1700	1	1006	17	37.5	97.5	50	32	9	0	83	3924.86	13	156
1701	0	1011	81	61.25	160	60	19	6	57	137	8895	9	102
1702	0	1002	54	40	110	50	34	11	46	172	10332.5	15	68
1703	0	1003	9	23.125	80	60	3	8	31.7077	229	8106.57	25	11
1704	1	1005	89	46.2	110	60	7	20	71.5385	186	8928	25	54
1705	1	1006	17	32.5	90	50	28	13	4	205	7076.67	21	35
1706	1	1006	7	40	97.5		12		62	149	14530	7	91
1707	1	1009	82	25.3	60		20		25	61	3682.5	8	179
1708	1	1009	82	33.75	95		19		21	70	6647.5	9	170
1709	1	1009	56	36.25	90		6		1	116	10464	18	124
1710	0	1011	30	55	122.5	50	12	7	2	186	10835	12	54
1711	0	1011	24	67.2	160	50	12	7	2	139	11177.5	12	101
1712	0	1011	65	68	170		2		14	31	5325	8	209
1713	0	1011	81	61.25	170		2		15	36	6037.5	8	204
1714	0	1011	65	59	147.5		7		22	53	7832.5	8	187
1715	1	1006	17	56.875	145		11		25	66	9542.5	8	175
1716	1	1001	38	47.5	122.5	50	7	10	21.6593	219	10512	25	23
1717	1	1001	38	100.125	222.5		32		62	213	47438.8	22	29
1718	1	1001	31	75.375	172.5		7		29	86	14780	8	156
1719	1	1006	10	40	110		11		10	105	11520	43	137
1720	1	1001	31	83.75	172.5	50	21	9	28.4066	125	11280	33	118
1721	1	1001	31	71.25	147.5	50	24	4	64	155	12702.5	8	88
1722	1	1001	31	71.25	147.5	50	15	13	98	176	15255	17	67
1723	1	1001	31	71.25	147.5	50	24	4	46	112	8410	8	132
1724	1	1006	35	42.5	110	50	25	7	12.7473	232	11136	24	12
1725	1	1009	78	21.375	55	50	32	9	28	152	4695	13	92
1726	0	1004	3	60	170		23		38	84	14325	9	161
1727	1	1006	14	30	85	50	25	7	26.5846	216	9928.38	24	29
1728	0	1011	96	64	160	50	15	6	45	148	15252.5	9	97
1729	0	1004	89	81.9	195	60	17	10	69	115	16147.5	15	131
1730	0	1004	94	50	110		37		14	33	3670	8	213
1731	0	1004	94	50	110		37		18	34	3731.25	8	212
1732	0	1011	65	51	170	50	36	8	2	98	7600	13	148
1733	0	1011	30	35.65	85		2		17	45	3835	8	201
1734	0	1011	65	34	85		2		16	38	3256.25	8	208
1735	0	1011	24	61.5	150		41		36	96	14407.5	8	150
1736	0	1006	90	39.375	120	50	19	6	45.4945	230	11040	30	17
1737	1	1006	17	37.5	97.5	50	20	8	30.3231	219	10512	29	28
1738	1	1006	7	57.5	147.5	60	23	9	28.8	108	9984	26	139
1739	0	1011	63	33.75	72.5	50	32	6	91	219	7763.33	9	28
1740	1	1001	31	58.75	122.5	50	29	8	15.6923	138	11424	25	110
1741	1	1006	10	32.5	90	50	33	8	48	220	8110	16	28
1742	1	1006	17	56.875	145	60	11	13	87.6923	128	10944	38	120
1743	1	1009	0	55	122.5	50	32	4	0	121	6877.5	22	128
1744	1	1004	82	30	95	50	15	8	0	201	9302.5	17	50
1745	0	1005	89	81.9	195	60	6	10	57	103	14112.5	13	148
1746	1	1006	35	32.5	85		26		8	126	10752	23	125
1747	0	1006	90	31.25	85	60	15	10	96.8846	229	10992	34	22
1748	1	1006	17	38.75	97.5		2		23	67	6500	8	184
1749	1	1001	31	108.75	222.5	50	24	4	48	106	12250	8	146
1750	1	1006	17	56.875	145	50	16	8	25.2747	130	11040	33	122
1751	1	1006	10	30	85	50	11	13	77.2308	251	12048	43	1
1752	1	1006	14	41.875	120		7		15	50	5945	8	202
1753	1	1006	17	54.375	122.5		11		16	53	6475	8	199
1754	1	1006	7	40	97.5		10		15	50	4880	9	202
1755	0	1011	30	40.625	90	50	16	5	46	151	8397.5	8	101
1756	0	1011	30	43.75	97.5	50	16	5	83	119	9365	8	133
1757	0	1011	65	44	110		29		16	49	5407.5	8	203
1758	1	1011	85	80.625	197.5		33		16	38	7476.25	8	214
1759	1	1011	85	67.1	172.5		29		16	38	6537.5	8	214
1760	0	1011	65	68	170		2		20	64	10840	8	188
1761	0	1011	30	54.25	172.5		2		18	39	6736.25	8	213
1762	0	1011	63	33.75	72.5		40		34	83	6040	9	169
1763	1	1011	85	36	97.5		19		16	43	4223.75	9	209
1764	1	1001	31	71.25	147.5	50	24	4	50	146	11310	8	107
1765	1	1001	38	147.5	295	50	23	7	11	27	5106.15	9	226
1766	0	1003	43	25	80		15		58	127	10167.8	13	126
1767	1	1006	7	40	97.5	50	25	7	25.9341	236	11328	24	17
1768	0	1011	96	62.5	162.5	50	37	7	32	175	14552.5	12	78
1769	1	1006	17	37.5	97.5	50	20	8	14.2418	216	10368	29	38
1770	0	1011	63	71.25	147.5	50	39	6	44	129	11482.9	10	125
1771	1	1001	31	83.75	172.5		37		29	104	17998.3	17	151
1772	1	1006	7	47.5	122.5	50	9	15	26.0923	212	10176	40	43
1773	1	1001	31	83.75	172.5		15		3	87	15020	17	169
1774	1	1006	10	31.25	90	50	25	7	58.2637	241	11568	24	15
1775	1	1006	17	40	105	50	37	7	3	114	7531.67	12	142
1776	1	1005	89	46.2	110	60	4	23	100.615	218	10464	28	39
1777	1	1006	14	37.5	110	50	29	8	42	230	10577.5	20	27
1778	1	1001	38	66.375	147.5		22		7	84	12336	32	174
1779	1	1001	31	46.25	97.5	50	21	9	99.4231	235	11280	33	23
1780	1	1005	89	46.2	110	60	4	23	64.6154	210	10080	28	48
1781	1	1006	14	45	145		2		26	57	8307.5	8	201
1782	1	1009	0	47.5	105	50	32	4	3	149	8940	22	109
1783	0	1011	81	23.875	80	50	15	6	60	198	6630	9	60
1784	0	1011	24	41	100		41		17	36	3575	8	222
1785	1	1006	7	77.5	197.5	50	14	10	39.7363	126	10848	35	133
1786	1	1001	38	43.875	97.5	50	23	9	14.011	255	12240	31	5
1787	1	1001	31	83.75	172.5	50	3	10	61.7143	134	11232	29	127
1788	1	1009	82	57.5	120		16		25	66	7952.5	8	195
1789	0	1011	96	75	190		7		45	120	22785	8	141
1790	1	1011	85	45	110		32		24	63	6892.5	9	198
1791	1	1001	38	77.625	172.5		15		0	41	7038	17	221
1792	1	1004	82	51.25	145	50	32	9	3	259	13731.7	22	3
1793	0	1011	96	95	215		2		19	46	9902.5	8	216
1794	1	1006	17	54.375	122.5		19		8	154	18816	30	109
1795	1	1006	17	41.25	110	50	20	8	23.7363	240	11520	29	23
1796	1	1009	9	37.8	123.75	50	16	7	38.1538	248	11904	29	15
1797	1	1009	53	38.5	122.5	50	15	8	12.8077	259	12432	39	4
1798	1	1009	78	49.175	120	60	18	9	83.0769	140	11520	27	123
1799	0	1011	38	61.875	172.5	50	12	7	2	193	15245	12	70
1800	1	1011	85	42.75	110	50	9	12	2	164	8892.62	15	99
1801	1	1001	31	83.75	172.5		23		14	145	25056	31	119
1802	1	1009	78	49.175	120	60	19	8	22.1538	152	12096	26	112
1803	0	1011	65	58	145	50	11	8	42	209	13272.5	13	55
1804	0	1011	81	40.75	110	50	15	6	39	129	8870.4	9	135
1805	0	1011	24	51	170		2		15	48	8102.5	8	216
1806	0	1011	65	59	147.5		29		16	47	6980	8	217
1807	0	1011	24	34	90		7		39	116	10455	8	148
1808	0	1011	30	29.9	72.5		7		67	149	10772.5	8	115
1809	0	1003	56	30	95		6		1	42	3966.67	22	223
1810	1	1001	31	108.75	222.5		7		74	177	39320	8	89
1811	0	1006	90	36.875	120	50	12	12	87.2308	252	12096	37	14
1812	1	1006	7	37.5	74.95	50	28	16	94	231	10168.3	21	35
1813	0	1006	90	37.5	120		7		40	96	11472.5	8	170
1814	1	1006	17	55.625	145		45		8	24	3505	9	244
1815	0	1011	81	40.75	110	50	19	6	36	106	7403.88	9	162
1816	1	1011	85	75.625	185		6		9	21	3845	9	247
1817	1	1001	38	43.875	97.5		32		64	140	13641.7	22	129
1818	1	1001	31	40	85	50	24	4	45	132	6207.5	8	137
1819	1	1005	61	34.4	80	50	6	21	18.2857	208	9984	26	61
1820	1	1006	7	82.5	222.5	50	37	11	57	265	23163.3	17	4
1821	1	1006	10	30	85	60	28	9	150	247	8845	21	22
1822	1	1006	17	37.5	97.5		29		16	47	4537.5	8	222
1823	1	1009	53	67.5	147.5	50	11	12	28.044	132	11136	38	137
1824	0	1004	89	60.9	145	60	16	11	51	133	11195	16	137
1825	1	1006	7	57.5	147.5	50	37	7	2	98	6080	12	172
1826	1	1006	10	60	172.5	60	37	7	3	107	12373.3	12	163
1827	1	1011	85	47.5	122.5	50	9	12	38	191	11355	15	79
1828	0	1011	96	31.5	87.5	50	15	6	44	146	7556.06	9	124
1829	1	1005	94	38.5	110	60	5	18	81.9231	213	10224	27	58
1830	1	1006	14	65	195		9		5	124	24096	40	147
1831	1	1009	9	22.5	50		28		51	260	13008	26	11
1832	1	1001	38	43.875	97.5		14		4	226	22021.8	18	46
1833	1	1006	10	30	90	50	24	8	23.1868	211	10128	25	61
1834	1	1009	0	47.5	105	50	32	4	1	156	7905	22	116
1835	1	1001	31	71.25	147.5		15		62	233	34400	17	40
1836	1	1001	38	77.625	172.5	60	23	9	83.4231	141	11568	26	132
1837	1	1001	31	65	135		16		54	157	21187.5	8	116
1838	1	1009	78	21.4	55	50	17	8	33.2308	252	8838.99	28	21
1839	1	1009	78	40.65	100	50	17	11	35.0308	207	9936	28	66
1840	1	1005	94	38.5	110	60	5	20	82.6923	215	10320	27	59
1841	1	1006	17	40	110	50	34	7	50	227	10253.3	15	48
1842	1	1006	17	38.75	97.5		7		19	42	4110	8	233
1843	1	1001	31	83.75	172.5	50	34	7	2	166	15360	20	110
1844	1	1006	17	36.25	97.5	50	29	8	82	256	11091.7	20	20
1845	1	1006	35	40	97.5	50	25	7	38.7692	252	12096	24	24
1846	1	1006	17	30	90	60	17	8	27.8022	253	10216.8	32	23
1847	1	1009	78	34.2	85	60	19	8	36.2198	206	8603.37	26	70
1848	1	1011	85	68.75	197.5		41		47	139	27412.5	8	137
1849	0	1011	24	39.875	100		6		24	53	5340	9	223
1850	1	1011	85	35	85		32		36	106	9020	9	170
1851	1	1001	38	55.125	122.5		31		7	103	12624	23	174
1852	1	1001	31	58.75	122.5	50	24	12	84.9231	176	13248	30	103
1853	1	1001	38	43.875	97.5	50	32	9	143	257	12656.7	17	22
1854	1	1005	61	63.425	147.5	60	6	21	93.4615	143	11664	26	136
1855	1	1006	10	42.5	120	50	34	7	0	123	9455	15	156
1856	1	1009	53	32.5	72.5	50	15	8	12.0879	275	9803.33	39	4
1857	0	1011	81	74.75	185	60	37	9	41	125	15825	12	154
1858	1	1006	10	32.5	95	50	34	7	2	235	8170	15	45
1859	0	1006	90	32.5	85		20		18	145	12288	29	136
1860	1	1009	9	36	85	50	19	5	15.2308	231	11088	26	50
1861	1	1009	9	26.25	80	50	21	11	39.9121	227	10057.2	24	54
1862	0	1004	89	60.9	145	60	16	11	60	149	12046.7	16	133
1863	0	1004	61	95.675	222.5		32		7	23	5025	9	259
1864	1	1006	14	57.5	170	50	16	12	26.6044	169	12912	33	113
1865	0	1011	30	50.6	122.5	50	13	6	65	216	12302.5	11	66
1866	0	1011	81	27.125	72.5		2		33	108	7842.5	8	174
1867	1	1001	31	46.25	97.5	50	24	12	107.692	280	13440	30	3
1868	1	1001	31	40	85	50	14	14	34	106	8160	18	178
1869	1	1001	31	83.75	172.5		17		81	146	25257.6	15	138
1870	1	1006	10	32.5	90		13		7	151	13584	32	133
1871	0	1011	65	48	120	50	15	4	79	190	12852.5	9	94
1872	1	1001	31	83.75	172.5	50	21	15	107.308	79	13392	33	207
1873	1	1006	10	35	105	50	32	9	4	247	9848.33	17	39
1874	1	1006	10	27.5	80	50	20	5	38.7692	280	12610.5	34	6
1875	0	1006	90	52.5	145	50	26	7	42.6154	177	13296	23	109
1876	0	1003	2	23.75	80		9		15	81	6473.33	19	206
1877	0	1006	90	43.75	120		19		9	207	24864	30	80
1878	0	1006	90	49.375	145	50	26	6	1	76	9732.5	19	211
1879	0	1011	63	83.75	172.5		41		22	33	5717.5	8	254
1880	1	1001	38	77.625	172.5		16		1	44	7512	16	244
1881	1	1001	31	71.25	147.5		15		49	128	18825	9	160
1882	0	1002	3	25	70	60	22	8	85	205	5748.33	10	83
1883	0	1003	9	12.5	32.45	50	5	19	125.538	272	6426.71	23	16
1884	0	1005	89	81.9	195	60	6	10	27	132	12365.1	13	156
1885	1	1006	10	32.5	90	50	20	8	42	273	13104	29	15
1886	1	1006	7	45	110	50	21	7	37.5231	271	13008	28	17
1887	1	1006	7	65	172.5	50	36	8	0	109	13048.3	13	179
1888	1	1009	9	42.525	140		14		1	135	18960	18	153
1889	0	1011	4	68.5	171.25		33		13	33	5645	8	255
1890	1	1001	38	55.125	122.5	50	13	12	99	245	15486.7	19	44
1891	0	1003	63	28.125	80	50	37	11	76	285	8848.33	17	5
1892	0	1004	82	41.875	120	60	16	14	34	155	9728.33	16	135
1893	1	1006	17	37.5	97.5		24		14	131	12816	25	159
1894	1	1001	31	83.75	172.5	60	3	10	69.2308	100	9600	29	191
1895	1	1006	10	30	85	50	28	9	57	182	8168.33	21	109
1896	0	1006	90	34.375	95		34		51	171	16235	7	120
1897	1	1009	9	22.5	50		28		72	273	13632	26	18
1898	0	1011	63	71.25	147.5		33		12	40	5927.5	8	251
1899	1	1001	31	83.75	172.5		4		14	61	10464	28	231
1900	1	1001	31	52.5	110	50	3	8	3	145	10323.3	16	147
1901	1	1009	53	55	122.5		11		24	58	7047.5	8	234
1902	0	1011	63	20.625	60		33		1	143	8582.5	16	149
1903	1	1001	38	73.75	147.5	50	19	9	63	163	17441.7	13	130
1904	1	1006	17	91.875	245	60	38	6	49	118	12085	11	175
1905	1	1009	78	52.25	115	60	12	15	91.0385	163	12624	33	130
1906	1	1001	38	77.625	172.5		6		1	68	11780	13	226
1907	1	1004	7	51.25	135	60	13	12	43	134	11611.7	19	160
1908	0	1003	47	31.25	95		8		2	145	13746	20	150
1909	0	1004	82	59.375	170	60	16	7	1	52	7787.5	16	243
1910	0	1011	65	40.5	135	50	15	4	84	201	11817.5	9	94
1911	1	1011	85	42.875	122.5	50	4	15	4	226	11395	20	69
1912	1	1006	10	37.5	110	50	19	9	35.8681	272	13056	30	24
1913	1	1009	78	23.55	60	50	18	7	44	220	7855	14	76
1914	0	1011	81	61.25	160	50	34	10	3	167	13335	15	129
1915	0	1011	65	59	147.5	50	34	10	44	139	13210	15	157
1916	0	1004	82	51.25	145	60	16	7	47	214	13140	16	83
1917	1	1006	17	33.75	97.5	50	17	7	40.7692	265	12720	32	32
1918	0	1011	24	50.375	170	60	35	9	37	254	15893.3	14	43
1919	1	1001	38	43.875	97.5		13		25	127	12385	19	171
1920	0	1003	47	31.25	95		8		53	198	18810	20	100
1921	0	1003	40	30.625	95		6		42	92	8700	22	206
1922	0	1003	56	31.25	95		20		46	120	11390	8	178
1923	1	1005	94	38.5	110	50	5	18	39.2615	232	11136	27	66
1924	1	1006	17	42.5	97.5	50	29	15	134	240	10806.7	20	58
1925	1	1009	82	33.75	95	60	19	13	100	260	12480	26	38
1926	0	1011	96	35	87.5		7		27	79	6900	8	219
1927	1	1001	31	40	85	50	3	13	42.1385	249	11952	29	50
1928	0	1003	18	27.5	95	50	24	9	24.7912	282	13536	25	17
1929	0	1003	18	27.5	95	50	24	9	25.1429	286	13728	25	13
1930	0	1004	82	59.375	170	50	16	7	2	74	10292.5	16	225
1931	1	1004	7	50	122.5	50	13	12	56	256	13055	19	43
1932	1	1004	82	51.25	145	60	14	16	47	158	12696.7	18	141
1933	1	1006	10	32.5	90	50	19	9	52.4176	265	12720	30	34
1934	1	1006	17	35	90	50	29	12	53	264	9345	20	35
1935	0	1011	24	53.125	140	50	12	7	2	154	11735	12	145
1936	0	1011	65	38	95		29		26	70	6630	8	229
1937	0	1003	45	16.25	37.45	50	10	14	84	284	6705	18	16
1938	0	1003	56	31.25	95		20		40	116	11050	8	184
1939	1	1006	10	31.25	85	50	28	9	2	173	8235	21	127
1940	1	1006	17	38.75	97.5		11		14	36	3530	8	264
1941	1	1006	10	30	85		11		30	88	7490	8	212
1942	1	1009	53	55	122.5	60	15	9	43.7802	149	11952	34	151
1943	1	1009	82	43.125	120		19		22	66	7947.5	9	234
1944	0	1011	96	70.2	172.5	50	12	7	31	211	20675	12	89
1945	0	1011	24	29.4	70	50	11	8	2	164	6911.67	13	136
1946	0	1011	96	35	87.5	50	8	11	4	172	8376.67	16	128
1947	0	1011	96	72.5	180		7		18	40	7162.5	8	260
1948	0	1011	24	52.5	150		41		40	118	17665	8	182
1949	0	1011	24	43.75	125		41		35	84	10500	8	216
1950	0	1011	96	37.5	95		7		19	45	4282.5	8	255
1951	0	1011	96	67.5	170		7		19	63	10697.5	8	237
1952	1	1011	85	77.1	197.5		29		20	39	7707.5	8	261
1953	0	1011	96	60	147.5		7		63	169	24932.5	8	131
1954	0	1011	81	32.5	85		28		40	97	8285	9	203
1955	1	1004	7	50	122.5	60	13	14	134	240	12890	19	61
1956	1	1004	7	50	122.5	60	13	17	96	211	14040	19	90
1957	0	1011	30	60.95	147.5	50	15	4	106	234	17377.5	9	67
1958	0	1006	90	33.75	90	50	25	8	26.4615	301	14448	29	1
1959	1	1009	9	36.75	110	50	21	11	34.5495	262	12576	24	40
1960	1	1001	31	157.5	320		41		21	53	16912.5	8	250
1961	1	1001	31	83.75	172.5		15		2	95	16352	17	209
1962	1	1006	10	37.5	110		11		23	116	12768	38	189
1963	1	1001	38	100.125	222.5		10		0	74	16354	22	232
1964	1	1001	38	43.875	97.5	50	22	10	56.3077	305	14640	32	1
1965	0	1004	61	84.925	197.5	50	32	9	2	150	13719.1	13	156
1966	0	1004	89	44.1	105	60	17	10	2	151	8358.33	15	155
1967	0	1011	63	20.625	60		33		0	106	6370	16	200
1968	0	1011	63	27.5	60	50	31	6	99	138	6497.5	10	168
1969	0	1011	96	42	105	50	15	6	69	229	11726.7	9	77
1970	1	1011	85	80.625	197.5		32		10	26	5210	9	280
1971	1	1005	55	47.5	122.5	50	6	15	48.5538	263	12624	26	44
1972	1	1002	85	33.75	95	50	11	10	60	279	12722.5	21	29
1973	0	1005	55	47.5	122.5	60	7	9	0	87	4194.79	12	221
1974	0	1005	55	47.5	110	60	7	9	2	81	4150.43	12	227
1975	1	1006	10	30	85	50	16	8	56.3077	305	14640	38	3
1976	1	1011	85	50	122.5	50	6	13	51	236	21820	18	72
1977	0	1006	90	28.75	85	50	24	13	130.308	308	14784	30	1
1978	1	1009	82	45	95		15		35	254	24110.6	30	55
1979	1	1001	31	40	85		6		72	157	13347.5	9	153
1980	1	1002	67	32.5	110	50	6	10	36.2637	275	13200	26	35
1981	1	1006	10	30	85		12		16	163	13824	37	147
1982	1	1009	82	25.3	60	50	19	5	18.5275	281	10117.1	26	29
1983	0	1011	96	80	185		2		36	95	17537.5	8	215
1984	0	1011	30	37.375	90		7		76	201	18080	8	109
1985	1	1006	10	30	95	60	37	7	108	267	10681.7	12	44
1986	0	1011	81	50	135	50	11	8	4	233	14171.7	13	78
1987	0	1011	96	39	97.5	50	19	6	57	136	8887.5	9	175
1988	0	1011	24	65	220	50	35	9	30	205	23500	14	106
1989	1	1001	31	71.25	147.5	50	14	7	42	207	16972.5	18	105
1990	0	1004	61	74.175	172.5	60	20	7	82	154	16462.5	12	158
1991	0	1005	89	81.9	195	60	7	9	94	154	16697.5	12	158
1992	1	1006	10	37.5	110		2		48	117	12817.5	8	195
1993	1	1006	10	33.75	95		6		49	129	12215	9	183
1994	0	1011	30	35.65	85	50	12	7	46	230	10612.5	12	82
1995	0	1011	65	64	160		2		11	37	5922.5	8	275
1996	0	1011	30	66.7	160		7		25	68	10947.5	8	244
1997	0	1011	30	60.95	147.5		7		55	161	23762.5	8	151
1998	0	1011	81	67.875	172.5		28		16	47	8027.5	9	265
1999	0	1011	81	29.875	80		6		48	142	11347.5	9	170
[truncated: 2,081 more rows]
[truncated: 7 more columns]
